# ***dN/dS* dynamics quantify tumour immunogenicity and predict response to immunotherapy**

**Luis Zapata<sup>1\*</sup>, Giulio Caravagna<sup>1</sup>, Marc J Williams<sup>2</sup>, Eszter Lakatos<sup>2</sup>,  
Khalid AbdulJabbar<sup>1</sup>, Benjamin Werner<sup>1</sup>, Trevor A Graham<sup>2\*</sup>, Andrea  
Sottoriva<sup>1\*</sup>**

<sup>1</sup> Centre for Evolution and Cancer, Institute of Cancer Research, London, UK

<sup>2</sup> Centre for Genomics and Computational Biology, Barts Cancer Institute, Barts and the London School of Medicine and Dentistry, Queen Mary University of London, UK

\* Correspondence to: [luis.zapata@icr.ac.uk](mailto:luis.zapata@icr.ac.uk), [t.graham@qmul.ac.uk](mailto:t.graham@qmul.ac.uk) and [andrea.sottoriva@icr.ac.uk](mailto:andrea.sottoriva@icr.ac.uk)

## **Abstract**

*Immunoediting is a major force during cancer evolution that selects for clones with low immunogenicity (adaptation), or clones with mechanisms of immune evasion (escape). However, quantifying immunogenicity in the cancer genome and how the tumour-immune coevolutionary dynamics impact patient outcomes remain unexplored. Here we show that the ratio of nonsynonymous to synonymous mutations (*dN/dS*) in the immunopeptidome quantifies tumor immunogenicity and differentiates between adaptation and escape. We analysed 8,543 primary tumors from TCGA and validated immune *dN/dS* as a measure of selection associated with immune infiltration in immune-adapted tumours. In a cohort of 308 metastatic patients that received immunotherapy, pre-treatment lesions in non-responders showed increased immune selection ( $dN/dS < 1$ ), whereas responders did not and instead harbour a higher proportion of genetic escape mechanisms. Ultimately, these findings highlight the potential of evolutionary genomic measures to predict clinical response to immunotherapy.*

## 34 Introduction

35

36 Cancer is an evolutionary process, where natural selection acts upon somatic  
37 mutations that alter phenotypes, and drives adaptation<sup>1,2</sup>. Recent advances in  
38 genomic technologies have enabled the characterisation of mutational  
39 landscapes in thousands of malignant<sup>3,4</sup>, and healthy somatic tissues<sup>5,6,7,8</sup>. These  
40 studies found that a) 2 to 5 driver mutations are sufficient to initiate a malignancy,  
41 b) driver mutations are also present in normal tissue<sup>5,6,7</sup>, c) 90-95%% of somatic  
42 point mutations are neutral<sup>7-9</sup>, and d) the signals of negative selection in somatic  
43 tissues are weaker compared to germline evolution<sup>7,10</sup>. However, the roles of  
44 negative, positive, and neutral evolution during carcinogenesis remains  
45 debated<sup>11</sup>, especially with regards to the extent of neutral evolution<sup>12-14</sup> and  
46 negative selection<sup>7,8,15,16</sup>.

47

48 The application of evolutionary theory allows us to infer cell growth dynamics, the  
49 number of driver alterations<sup>17,18</sup> and their selective fitness coefficients<sup>19-22</sup>, as well  
50 as the impact of deleterious mutations during cancer progression<sup>23,24</sup>. An  
51 evolutionary metric recently used to detect selection in cancer studies is the ratio  
52 of nonsynonymous to synonymous mutations,  $dN/dS$ <sup>7,8,25-27</sup>. The rationale is that  
53 within a genomic locus, nonsynonymous mutations that decrease cell fitness will  
54 show a paucity (negative selection,  $dN/dS < 1$ ) while nonsynonymous mutations  
55 that increase cell fitness will be more frequent (positive selection,  $dN/dS > 1$ )  
56 compared to synonymous neutral mutations. Mutations modulate fitness by  
57 altering the birth-death rate of a cell (driver and deleterious mutations) or by  
58 causing immune-mediated predation of the lineage (neoantigens or immunogenic  
59 mutations). We recently explored the evolutionary dynamics caused by negative  
60 selection operating in cancer, demonstrating that negative selection – and its  
61 release by immune escape – leads to a predictable neoantigen variant allele  
62 frequency (VAF) distribution<sup>28</sup>. In theory, the shape of the neoantigen VAF  
63 distribution can measure selection, but technical limitations around neoantigen  
64 detectability in standard genome sequencing make the method impractical and  
65 under-powered. Here we show how  $dN/dS$ -based measures offer a robust

66 means to quantify negative selection strength and detect competing selective  
67 forces acting in distinct regions of the cancer genome.

68

69 The notion that the immune system influences cancer progression originated in  
70 the early 1900s<sup>29,30</sup>. It was only a century later, that studies in mice demonstrated  
71 that genetically inbred mice lacking lymphocytes, developed more spontaneous  
72 and chemically induced tumors than their wild-type counterparts<sup>30–32</sup>. These  
73 results engendered the concept of cancer immunoediting where tumor cells are  
74 subject to three phases: elimination, equilibrium, and escape<sup>29</sup>. Cancer  
75 immunoediting is an evolutionary process that shapes tumour immunogenicity by  
76 selecting for clones depleted of neoantigens (immune-adapted) or with an  
77 immune evasion phenotype (immune-escaped)<sup>33–35</sup>. Neoantigens are generated,  
78 among other mechanisms, by single nucleotide variants (SNVs) leading to  
79 aminoacidic changes in a peptide previously recognized as a self-antigen<sup>36</sup>.  
80 However, the extent of immunogenicity derived from SNVs in self-antigens  
81 remains unclear, particularly if anchor positions of the wild-type peptide are  
82 affected<sup>37</sup>. In our previous work, we observed signals of immune-mediated  
83 negative selection in the immunopeptidome, defined as all natively MHC-bound  
84 genomic regions, associated to levels of immune infiltration. Nonetheless, a  
85 recent study claimed that after applying a more stringent normalization method  
86 these regions do not harbour signals of selection<sup>16</sup>. In this work, we corroborated  
87 our earlier findings and we further provide an alternative explanation for the lack  
88 of signal reported recently.

89

90 The recent discovery of immune checkpoints (e.g. PD1 or CTLA4) as mechanism  
91 of immune evasion, led to the development of cancer therapies using immune  
92 checkpoint inhibitors (ICIs). Despite the promising clinical results of ICIs, only  
93 30% of patients treated with these therapies show significant response.  
94 Therefore, considerable effort has been dedicated to understand the interaction  
95 between the immune system and cancer<sup>38–43</sup>, and to identify genetic  
96 determinants of immunotherapeutic response. To date, quantification of tumor  
97 mutation burden (TMB) is the primary genomic biomarker for enrolling patients

98 into ICI treatment. The underlying hypothesis for TMB as a biomarker is that a  
99 higher number of somatic mutations leads to a higher number of neoantigens,  
100 and therefore a higher likelihood of immune clearance after checkpoint inhibition.  
101 However, recent studies have shown that even mismatch repair proficient tumors  
102 display a pathological response<sup>44</sup>, emphasizing the need for quantifying the true  
103 immunogenicity of the cancer genome and their potential clinical response to  
104 immunotherapy.

105

106 Here, we modelled cancer initiation and progression by adapting a stochastic  
107 branching process<sup>45</sup> to simulate changes in  $dN/dS$  over time as a measure of  
108 selection and tumor immunogenicity during immunoediting. Using the insight  
109 gained from our model, we assessed  $dN/dS$  values in 8543 primary tumours, as  
110 well as 308 metastatic cancers treated with ICIs. We first corroborate that immune  
111  $dN/dS$  correlates with levels of tumor infiltrating lymphocytes – a measure of the  
112 strength of immunoediting - in non-escaped tumors. Finally, by estimating  
113 immune  $dN/dS$  in pre-treated patients, we reported clinical response in immune-  
114 escaped patients that had an absence of immune selection (immune  $dN/dS \sim 1$ ).  
115 In contrast, tumors with low immune  $dN/dS$ , and therefore low levels of tumor  
116 immunogenicity, did not respond to the action of immune checkpoint inhibitors.

117

## 118 **Results**

### 119 **A mathematical model of immunoediting**

120 We extended our previous modelling work to incorporate the acquisition of  
121 nonsynonymous and synonymous mutations in driver (positively selected) and  
122 passenger (neutral) loci<sup>24,46,47</sup>, as well as in regions exposed to the immune  
123 system and regions that confer immune-evasion properties (Fig 1). The  
124 interaction of different mutations and the observed evolutionary dynamics can be  
125 simplified into four phases: 1) A pre-neoplastic phase where cells do not have  
126 cancer driver mutations but may acquire passenger, immunogenic or escape  
127 mutations (Fig 1A), 2) a neoplastic phase that begins when a driver mutation  
128 avoids stochastic drift and initiate a clonal expansion (Fig 1B), 3) an elimination  
129 phase where cells acquiring somatic mutations recognized by the immune

130 system are eliminated (Fig 1C), and 4) a phase where expanding clones lead to  
 131 a clinically-detectable tumor through either depletion of immunogenic mutations  
 132 (immune adapted) or through a mutation in the genome that triggers an immune  
 133 escape mechanism (immune escaped) (Fig 1D). An activated escape mechanism  
 134 hides the clone from the immune system so that neoantigens accrue without  
 135 being depleted by negative selection raising the overall tumor immunogenicity  
 136 (Fig S1A). It is possible for these phases to overlap each other. For example, an  
 137 escape mutation occurring pre-driver acquisition and thus pre-clonal expansion  
 138 leads to tumors "born" immune-escaped.

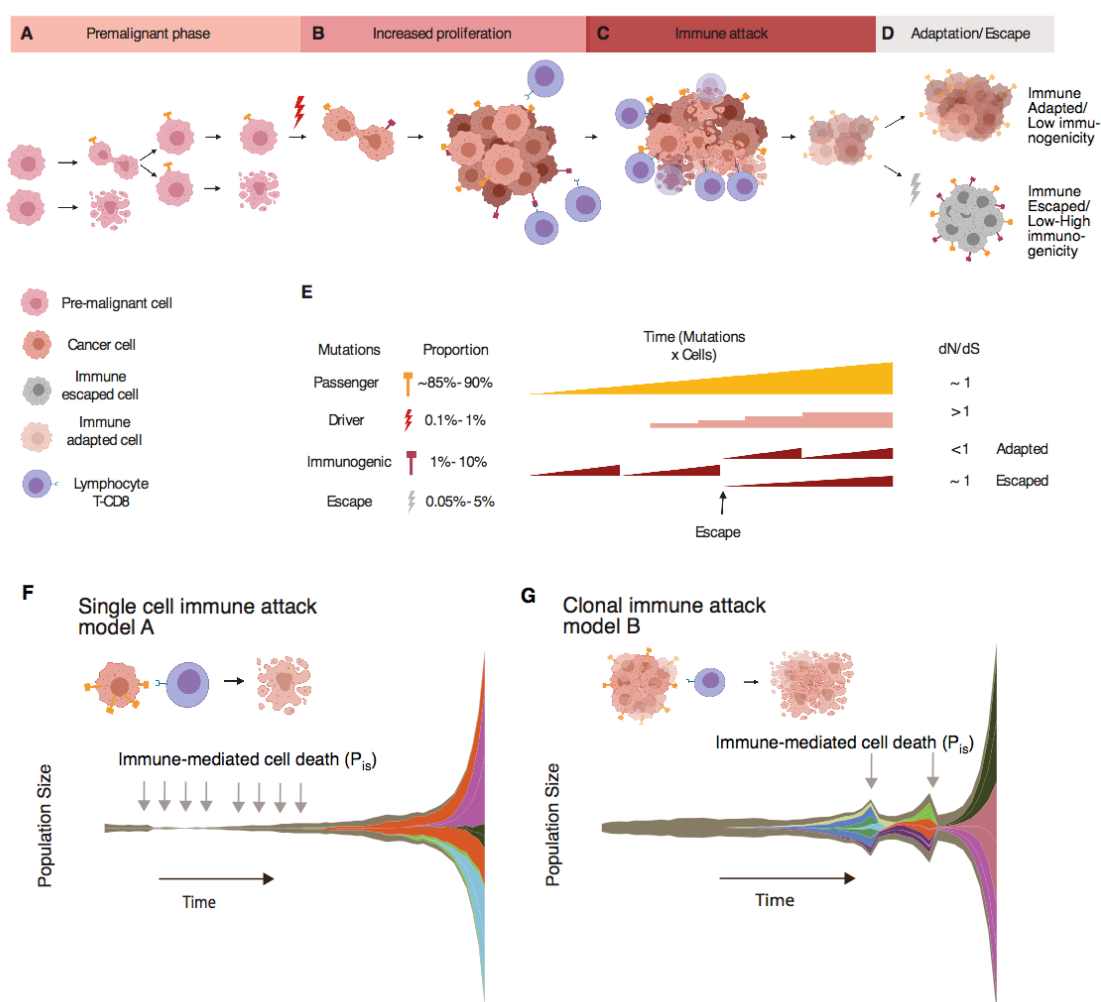

140

141 *Figure 1. Description of the stochastic branching process used to model immunoediting. A) An initial set of*  
 142 *wild type cells (Pre-malignant cell) divide and accumulates mutations. B) A driver mutation increases the*  
 143 *probability of cell division initiating a phase of increased proliferation of clones (Cancer cell). C) During the*  
 144 *phase of immune attack, the immune system removes cells carrying immunogenic mutations and might*  
 145 *eradicate the tumor completely or force the tumor to adapt or escape. D) Two possible scenarios emerge*  
 146 *as the outcome of immunoediting, cancer cells survive not harbouring immunogenic mutations (Immune*  
 147 *adapted) or due to the acquisition of an immune evasion mechanism (Immune escaped). E) These scenarios*

148 *can be differentiated by looking at the ratio of nonsynonymous to synonymous mutations ( $dN/dS$ ) in immune*  
149 *exposed regions of the genome. We defined two hypotheses of immune recognition: F) Single cell immune*  
150 *attack where any single cell carrying a neoantigen is able to initiate an immune response and be eliminated*  
151 *at a rate of immune-mediated cell death of  $P_{IS}$ , G) Clonal immune attack where a minimum percentage of*  
152 *immunogenic cells is needed to elicit an immune response, as recently observed in mice models<sup>48</sup>.*

153  
154 We initiated our model in the pre-neoplastic phase with a pool of  $N$  cells having  
155 an equal probability of birth ( $b$ ) and death ( $d$ ):  $b=d=0.5$  (Methods). For each  
156 successful cell division, a number of new mutations are sampled from a Poisson  
157 distribution with mean  $\mu \times L$  (mutation rate measured in mutations per base pair  
158 per cell division multiplied by the length of the coding genome,  $L$ ). We introduced  
159 nonsynonymous and synonymous mutations at a constant relative rate of 3 to 1  
160 given the expected genome composition<sup>49</sup>, so we could calculate the ratio  
161 between these two types of mutations ( $dN/dS$ ) in the evolved population of  
162 tumour cells. We assumed that passenger nonsynonymous and all synonymous  
163 mutations are neutral. Once a cell acquired a nonsynonymous mutation in a  
164 driver, the probability of cell division  $b$  increases by a fixed value obtained from a  
165 Gompertz function (Methods), driving the next stage of tumorigenesis.

166  
167 During immunoediting<sup>29,50</sup>, cells carrying an immunogenic mutations may elicit an  
168 immune response. We tested whether or not  $dN/dS$  values derived from the  
169 immunopeptidome, the portion of the genome constantly exposed to immune  
170 recognition (defined as 'Immune  $dN/dS$ '), quantifies overall tumor  
171 immunogenicity, and differentiates between adaptation and escape. We  
172 expected that when the immune predation was active and there were no escape  
173 mechanisms evolved, the immune  $dN/dS$  would be lower than 1 showing overall  
174 low tumor immunogenicity. Conversely, in the presence of escape mechanisms  
175 immune  $dN/dS$  would have values closer to 1, and therefore high  
176 immunogenicity. Additionally, we could also measure a 'global  $dN/dS$ ' by using  
177 mutations in all loci of the genome, and a 'driver  $dN/dS$ ' by considering only  
178 mutations in driver loci (Fig 1E). We then modelled two hypotheses of immune  
179 recognition (Fig S1B): (1) a classic model (model A) where a single cell carrying  
180 an immunogenic mutation is sufficient to elicit an immune response (Fig. 1F), and  
181 (2) a clonal model (model B), recently suggested<sup>48</sup>, where a percentage

182 *Pclonesize* of the total cells carrying the same immunogenic mutation is needed  
183 for the immune system to attack (Fig. 1G). In model A, the immune system is  
184 constantly pruning immunogenic cells, whereas model B produces a "rise and  
185 fall" pattern where immunogenic cells are allowed to expand to a threshold size  
186 but are then eliminated, similar to mass extinction events. Cells bearing a  
187 neoantigen are killed at an immune-mediated cell death rate  $P_{IS}$ , where  $P_{IS} \in$   
188  $[0,1]$ . This parameter models the stochastic probability of encounters between  
189 antigen presenting cells and cytotoxic T-cells. Model parameters are summarized  
190 in Supplementary Table 1.

191

### 192 **Evolutionary dynamics of $dN/dS$ during immunoediting reveals genomic** 193 **signals of tumor immunogenicity**

194

195 To first understand  $dN/dS$  dynamics during the pre-neoplastic phase, we  
196 simulated the acquisition of neutral mutations only (non-synonymous passenger  
197 and synonymous mutations) in an initial population of 32 cells for 30 generations  
198 (Fig S2). We compared three mutation rate regimes similar to those founds in  
199 some neoplasms: microsatellite stable ( $\mu\text{MSS}=10^{-8}$  mutations/bp/division),  
200 microsatellite unstable ( $\mu\text{MSI}=10^{-7}$ ), and POLE-like ( $\text{POLE}=10^{-6}$ ). On average,  
201 the population size remained constant over time for the three regimes and the  
202 number of mutations was higher for higher mutation rate regimes (Fig S2A-B).  
203 The average number of mutations per simulated population was  $10^2$ ,  $10^3$ , and  $10^4$   
204 for each mutation rate regime respectively (Fig S2B). As expected under neutral  
205 dynamics, we observed that the average  $dN/dS$  did not deviate significantly from  
206 1 and the variance was lower at high mutation rates. (95%CI for  $10^{-8}$ : 0.54-2.31,  
207 MSI:0.79-1.30, POLE:0.91-1.06) (Fig S2C).

208

209 To determine the influence of positive selection on  $dN/dS$  values over time during  
210 the increased proliferation phase, we simulated only passenger and driver  
211 events. We simulated 1000 datasets assuming 0.1%, 0.5% and 1% of driver sites  
212 (Fig S3). We focused our analysis on simulations where a clonal expansion  
213 occurred, as defined by a growing population of more than 1000 cells within 100

214 generations (Fig 2A). We calculated  $dN/dS$  over time for all mutations (global  
215  $dN/dS$ ) and for only driver mutations (driver  $dN/dS$ ). We observed large  
216 fluctuations of the global  $dN/dS$  values among the first generations due to the low  
217 number of mutations (Fig S3D). Interestingly, the accumulation of neutral variants  
218 pushed global  $dN/dS$  values to 1. Driver  $dN/dS$  peaked at high values and  
219 subsequently decreased towards one due to the accumulation of low frequency  
220 neutral variants (Fig S3E). As we demonstrated in Williams et al<sup>21</sup>, mutation  
221 frequency and driver  $dN/dS$  are expected to be positively associated showing the  
222 highest values at the largest clone sizes (Fig 2B). Accordingly, and as observed  
223 recently in clonal hematopoiesis<sup>22</sup>, the allele frequency spectrum (Cancer Cell  
224 fraction or CCF) of synonymous and non-synonymous mutations (Fig. 2C)  
225 showed that the observed high driver  $dN/dS$  is a consequence of proportionally  
226 fewer synonymous mutations at higher CCF thresholds compared to  
227 nonsynonymous mutations.



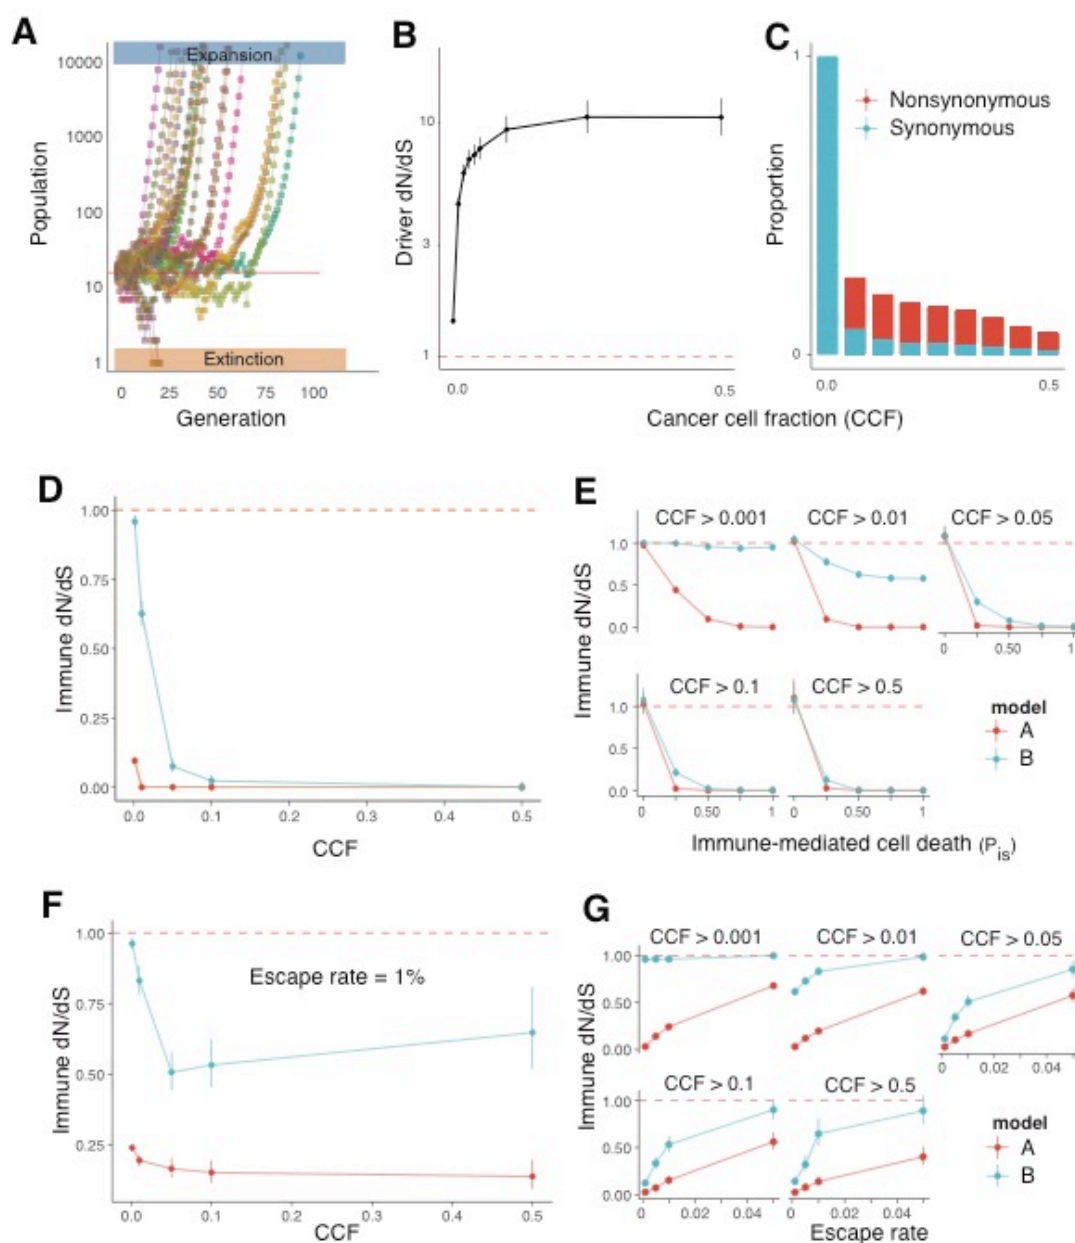

228

229 *Figure 2. Immunoediting leads to tumor adaptation or escape. A) We defined two outcomes for each*  
 230 *simulation: expansion and extinction. Expansion: Clonally expanded populations (Blue) that reached an*  
 231 *upper limit of number of cells in the first n generations. Extinction: Simulations that drifted to extinction*  
 232 *among the first n generations (Orange). B) driver dN/dS relationship to the cancer cell fraction. As described in*  
 233 *Williams et al<sup>21</sup> we show in our model that driver dN/dS increases at increasing values of clonality. C)*  
 234 *Relative proportion of nonsynonymous to synonymous mutations. The upward trend of dN/dS is due to a*  
 235 *high proportion of synonymous mutations removed at increasing CCF cut-offs. D) Immune dN/dS*  
 236 *relationship to cancer cell fraction for single cell (model A, Red) and for the clonal model (model B, Blue). A*  
 237 *sharp decrease in dN/dS at increasing CCF cut-offs consistent with the theoretical predictions for strong*  
 238 *negative selection<sup>21</sup>. E) Immune dN/dS relationship to the probability of immune-mediated cell death at*  
 239 *different levels of CCF. At low CCF, the dN/dS for model B is closer to one across all levels of immune death*  
 240 *due to the presence of several undetected small frequency clones carrying neoantigens. At high CCF, both*  
 241 *models show strong association between immune death and dN/dS. This results into cancer clones depleted*  
 242 *of neoantigens, classified as immune-adapted and bearing an overall low tumor immunogenicity. F) Immune*  
 243 *dN/dS at different CCF cut-offs when including escape mutations at 1% rate. At low CCF levels, immune*  
 244 *dN/dS decreases when increasing CCF but escaped clones push the signal of immune dN/dS towards one*  
 245 *at high CCF cut-offs for model B. G) Immune dN/dS relationship to the probability of immune-mediated cell*  
 246 *death at different levels of CCF when escape mutations are included. For both models, increasing the*  
 247 *probability of escape events pushes dN/dS values back to one for all CCF cut-offs, reflecting a relaxation of*

248 *immune-mediated negative selection. Ultimately, these tumors are growing with escape mechanisms that*  
249 *allow the accumulation of neoantigens that increase the overall tumor immunogenicity.*

250

251 During the elimination phase, in addition to driver and passenger mutations, we  
252 introduced immunogenic mutations (5% of immunogenic sites) and explored the  
253 dynamics under two mechanisms of immune recognition (Single cell versus  
254 clonal immune attack). We first calculated immune  $dN/dS$  values at different  
255 cancer cell fraction (CCF) cutoffs. We observed that at increasing clone sizes the  
256 immune  $dN/dS$ , and therefore tumor immunogenicity, value was approaching  
257 zero for both models (Fig 2D). As in model B negative selection is absent for  
258 small clones (low CCF), immune  $dN/dS$  was closer to 1. Then, we calculated  
259 immune  $dN/dS$  at varying rates of immune-mediated cell death,  $P_{IS}$ , for different  
260 clone sizes (Fig 2E). We first confirmed that when the immune system was  
261 inactive ( $P_{IS} = 0$ ), the immune  $dN/dS$  was one for all clones. At increasing levels  
262 of effective immune surveillance both models demonstrated depletion of  
263 immunogenic mutations, and therefore low levels of tumor immunogenicity.  
264 Immune  $dN/dS$  in model B was less affected by this parameter given that multiple  
265 immunogenic mutations can remain hidden at low frequency. Ultimately, these  
266 simulations showed how immune  $dN/dS$  reveals the action of immune-mediated  
267 negative selection and can be used as a proxy for tumor immunogenicity.

268

269 We next explored immune  $dN/dS$  values during the evolution of immune escape.  
270 The activation of escape is modelled as a stochastic event occurring at a fixed  
271 rate that depends on the proportion of escape sites in the genome. We repeated  
272 simulations using an immune-mediated cell death of  $P_{IS} = 1$  at different rates of  
273 escape. We first found that when the proportion of escape sites was 1%, immune  
274  $dN/dS$  captured the action of immune-mediated negative selection across the  
275 whole frequency spectrum (Fig 2F). In model B, immune escape pushed immune  
276  $dN/dS$  values back to one, slightly increasing overall tumor immunogenicity. At  
277 higher rates of immune escape, we observed increased immune  $dN/dS$   
278 demonstrating how tumor immunogenicity is restored for all clone sizes when  
279 escape events are more common (Fig 2G). Notably, when the escape rate was  
280 5%, all clone sizes in model B reached immune  $dN/dS$  values close to one,

281 highlighting high levels of tumor immunogenicity. By acquiring escape  
282 mechanisms, negative selection in the immunopeptidome is relaxed, the  
283 accumulation of immunogenic mutations becomes neutral, and tumor  
284 immunogenicity is restored.

285

286 The results of our modelling provide a theoretical framework of co-evolution of  
287 somatic cells and the immune system and a basis to quantify tumor  
288 immunogenicity based on immune  $dN/dS$ . Further, it illustrates the importance of  
289 choosing an appropriate region of the genome to analyse immune selection and  
290 how clone sizes explain different levels of tumor immunogenicity. Moreover, we  
291 speculate that when mixing patients that are immune-escaped with non-escaped,  
292 signals of immune-mediated negative selection are no longer representative of  
293 the overall tumor immunogenicity.

294

295 **High levels of lymphocyte infiltration are associated to strong immune-**  
296 **mediated negative selection and low levels of tumor immunogenicity**

297 To measure global, driver, and immune  $dN/dS$  values using genomic data, we  
298 developed SOPRANO (Selection On PRotein ANOtated regions), a bioinformatic  
299 pipeline that measures the extent of selection in specific regions of the genome  
300 ([github.com/luisgls/SOPRANO](https://github.com/luisgls/SOPRANO)). It extends our previous work, where we  
301 calculated  $dN/dS$  corrected for mutational context using a 7-substitution type  
302 (SSB7) or a 192-substitution model (SSB192)<sup>8</sup>. Here, we have extended the  
303 method to account for any set of concatenated genomic regions allowing for  
304 patient- and region- specific  $dN/dS$  estimates. We applied SOPRANO to 8543  
305 tumour samples from 19 cancer types from The Cancer Genome Atlas (TCGA),  
306 using the SSB192 model (Fig 3, Supplementary Table 2). We compared the ratio  
307 of  $dN/dS$  values between regions inside and outside the immunopeptidome  
308 (ON/OFF  $dN/dS$ ). We defined the immunopeptidome as all possible wild-type 9-  
309 mer regions present in the genome of a patient that are predicted to bind to the  
310 MHC-I complex with an affinity of %rank < 0.5 as defined in netMHC4.0 (Fig S4).  
311 In our first analysis, we used our previously published set of regions that bind to  
312 HLA-A0201 and compared them to a recently published proto-HLA<sup>16</sup> consisting

313 of multiple HLA alleles. We found that lung adenocarcinoma (LUAD) and  
314 melanoma (SKCM) showed a depletion of nonsynonymous mutations in HLA-  
315 A0201 binding regions, and that LUAD, HSNL and LUSC showed a depletion of  
316 nonsynonymous mutations in proto-HLA regions (Fig 3A). We compared the  
317 immune  $dN/dS$  values (ON/OFF  $dN/dS$ ) obtained using SOPRANO to the values  
318 of immune selection (normalized HLA-binding mutation ratio or HBMR), recently  
319 reported by Van Den Eynden et al<sup>16</sup>. We observed a significant correlation  
320 between the ON/OFF  $dN/dS$  ratio and the reported normalized HBMR using the  
321 proto-HLA ( $R=0.77$ , P Value= 0.00054, Fig 3B) but not when comparing to the  
322 HLA-A0201 ( $R=0.37$ , P Value= 0.15, Fig S5). Expectedly, the correlation for the  
323 HLA-A0201 was lower given the HBMR value was calculated using multiple  
324 HLAs- binding regions and therefore every patient not carrying the proto-HLA  
325 allele will contribute with only neutrally accumulating mutations. In consequence,  
326 it is important to note that the smaller the fraction of the assessed region that is  
327 truly under immune selection, the more neutral the  $dN/dS$  value would appear.  
328

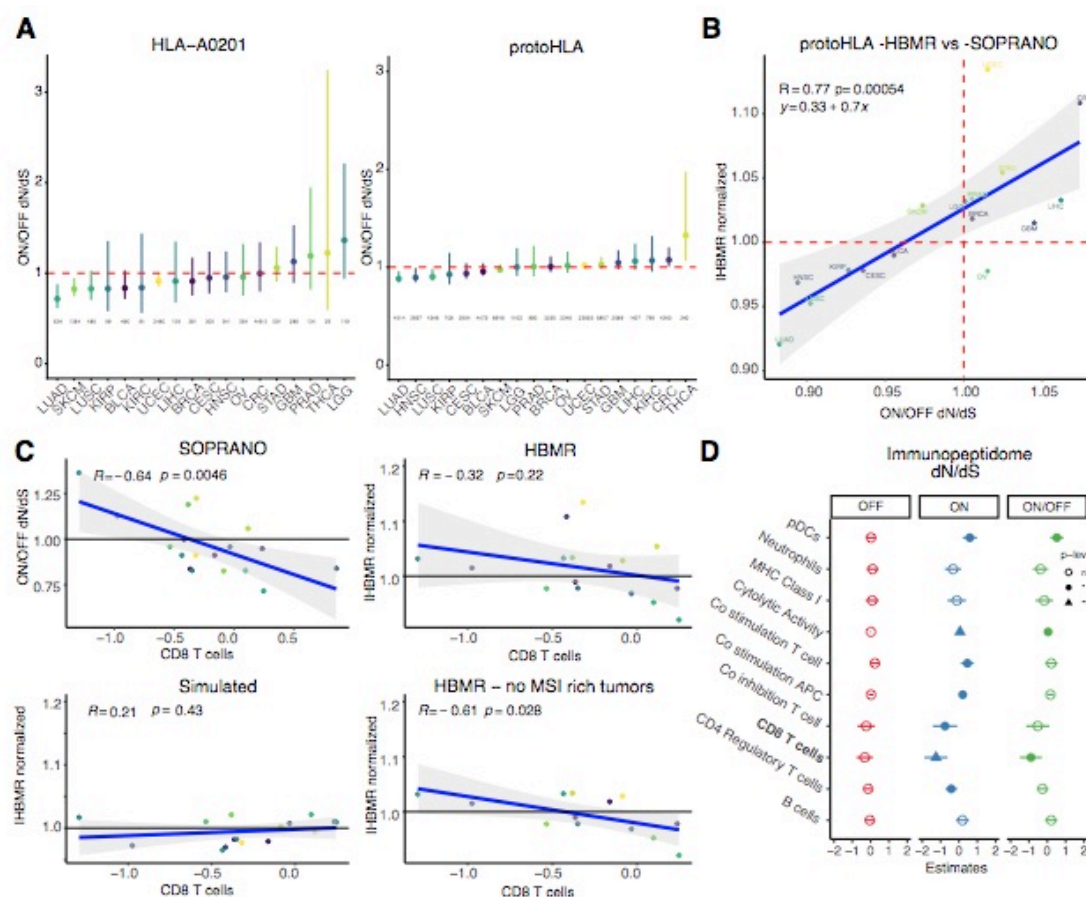

329

330 *Figure 3. Immune dN/dS and immune activity across multiple tumor types. A) Immune dN/dS (ON/OFF dN/dS*  
 331 *ratio) in multiple tumor types using either a curated HLA-A0201 target region or a proto-HLA consisting of*  
 332 *the most common HLA haplotypes in the population obtained from Van Den Eynden et al<sup>16</sup>. Numbers*  
 333 *represent the mutations ON target for each dataset. B) Comparison of immune dN/dS values using*  
 334 *SOPRANO SSB-192 and normalized HBMR values reported in Van Den Eynden et al.<sup>16</sup> C) Linear regression*  
 335 *models for immune dN/dS and HBMR values versus median CD 8 T cell infiltration levels. In the analysis*  
 336 *with no MSI-rich tumors, in addition to colorectal (CRC), we removed Stomach and Uterine cancer (STAD*  
 337 *and UCEC). D) Linear mixed model using dN/dS values as the dependent variables and all immune metrics*  
 338 *as independent variables. Model selection using AIC revealed that ON/OFF dN/dS is strongly associated to*  
 339 *the levels of CD8 T cells. No immune value was associated to the global dN/dS (OFF).*

340

341 To determine whether immune-mediated negative selection was associated with  
 342 levels of immune activity, we compared immune *dN/dS* to the levels of immune  
 343 infiltration previously reported in TCGA data<sup>51</sup> (Fig 3C). Median CD8 T cells  
 344 significantly correlated to the SOPRANO-derived immune *dN/dS* values in HLA-  
 345 A0201 regions ( $p=0.0046$ ) but not to the HBMR values (proto-HLA) calculated in  
 346 <sup>16</sup> ( $p=0.22$ ), even though the trend was negative for both. As expected, the  
 347 correlation was also not observed in the simulated dataset. Interestingly, when  
 348 tumour types where microsatellite instability (MSI) and mismatch-repair  
 349 deficiency was common, such as colorectal (CRC), stomach (STAD) and uterine  
 350 cancer (UCEC), were excluded from the analysis, the correlation between proto-

351 HLA HBMR and the median CD8 T cells was significant ( $P=0.028$ ), indicating that  
352 negative selection acts differently in these different tumour subgroups. This  
353 makes sense as hypermutant MSI tumours have a large frequency of escape  
354 events, such as upregulation of immune checkpoint mechanisms, loss of  
355 heterozygosity in the HLA region or mutations in genes associated to the antigen  
356 presenting machinery<sup>28,33,52</sup>. This last correlation was also strongly significant for  
357 cytolytic activity ( $P$ -value =  $6e-04$ , Fig S6).

358

359 We applied a linear mixed model to determine the contribution to the global  $dN/dS$   
360 (OFF), the immunopeptidome-specific (ON) and the immune- $dN/dS$  (ON/OFF)  
361 using reported immune variables (Fig 3D). We performed a stepwise model  
362 selection, and the initial (Fig S7) and best performing model for predicting  
363 Immune  $dN/dS$  ( $R$ -square adj= 0.89, AIC= -83,  $p$ -value = 0.01) had CD8 T cells  
364 as the most significant explanatory variable. Importantly, none of the variables  
365 could explain global  $dN/dS$  values and seven out of the ten variables tested was  
366 significantly associated to the immunopeptidome-specific ON value. Moreover,  
367 we found that there was no significant correlation between CD8 T cells and  
368 immune  $dN/dS$  in patients that have a truncating mutation in a gene associated  
369 to the antigen presenting machinery or genes defined as escape genes  
370 previously<sup>34</sup>.

371

372 In summary, these results highlight the importance of considering multiple  
373 confounding factors when drawing conclusions about the absence of negative  
374 selection at the cohort level using  $dN/dS$ . These results further suggest that high  
375 mutation burden tumors show signals of relaxed immune-selection confounding  
376 the calculation and interpretation of  $dN/dS$  probably due to the presence of  
377 acquired escape mechanisms, as our theoretical model predicts.

378

### 379 **Immune-escaped tumors show relaxed immune-mediated negative** 380 **selection and high tumor immunogenicity**

381 Following our immunoediting model, we hypothesized that escape events mask  
382 the signal of immune mediated negative selection and restore tumor

383 immunogenicity. We ran SOPRANO using a patient specific immunopeptidome  
384 (private HLA alleles) in colorectal (CRC), stomach (STAD) and uterine cancers  
385 (UCEC). While tumor mutation burden was expectedly higher for MSI and POLE  
386 tumors (Fig S8), ON-target immunopeptidome  $dN/dS$  values for MSI and POLE  
387 subtypes were also higher than for MSS tumors (Fig S9), consistent with high-  
388 mutation rate tumours being very frequently immune-escaped<sup>28</sup>.

389

390 We then classified different escape mechanisms for these tumors based on  
391 previous work<sup>28</sup>. We found that immune-escaped (Escape+) tumors have  
392 significantly more somatic mutations compared to non-escaped (immune  
393 adapted) tumors (MSS  $p=0.0085$  and MSI  $p=0.00026$ , Fig 4A). We then reasoned  
394 that a larger number of mutations in MSS escape+ tumors would push immune  
395  $dN/dS$  towards 1, given an extended time of neutral mutations accumulating in  
396 the genome *after* immune escape has occurred. Indeed, we found a significant  
397 positive correlation between tumor mutation burden and immune  $dN/dS$  for MSS  
398 escape+ tumors but not for immune adapted tumors (Escape-,  $p=1e-04$ , Fig 4B),  
399 suggesting that immune selection was still active in patients without an escape  
400 mechanism. We observed the same results when restricting our analysis to only  
401 clonal mutations (P Value = 0.003, Fig S10), confirming our previous suggestion  
402 that immune-escape tends to occur early in the genesis of these malignancies<sup>28</sup>.

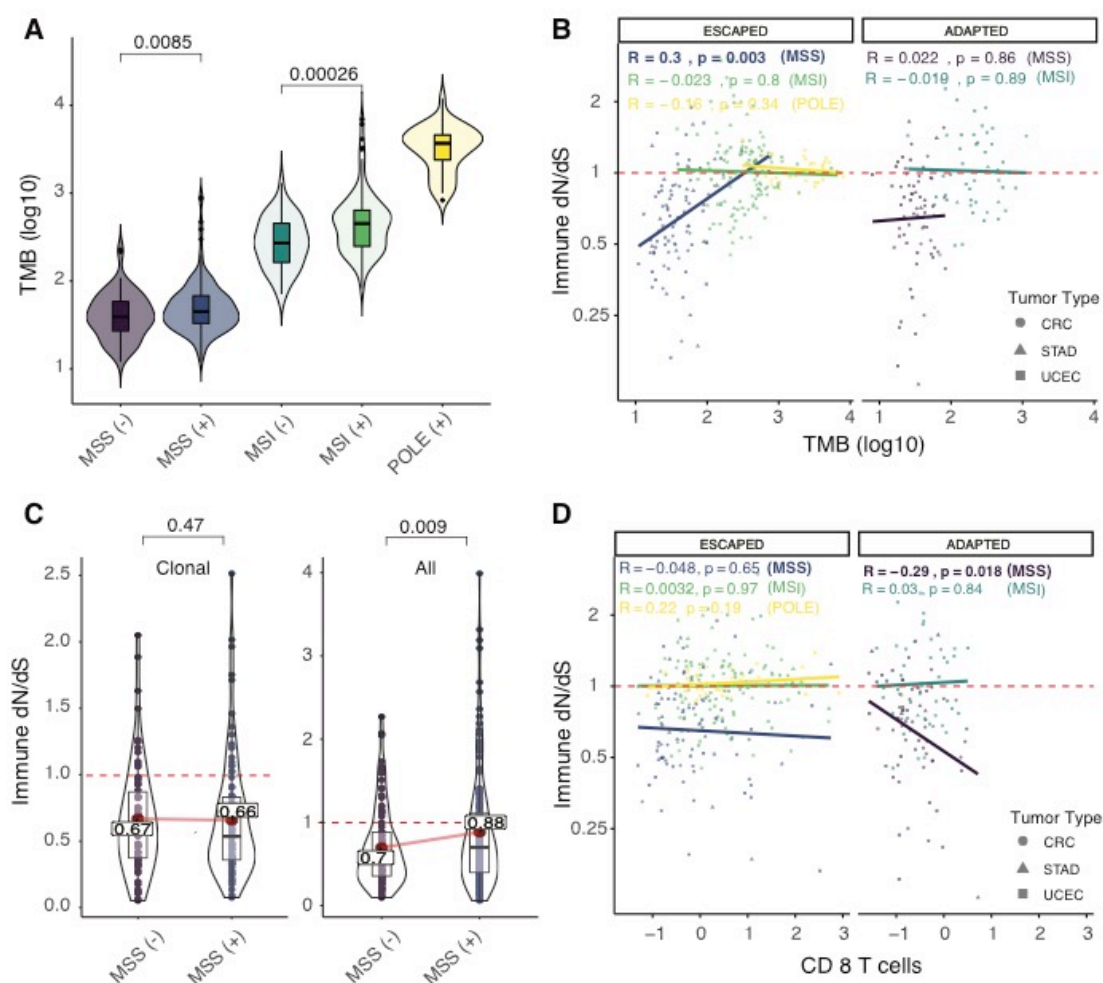

403

404 *Figure 4. Patient specific analysis of colorectal (CRC), stomach (STAD) and uterine cancer (UCEC) using*  
 405 *immune dN/dS. A) Tumor mutation burden (TMB) for different subtypes of cancers, including Microsatellite*  
 406 *Stable (MSS), Microsatellite Instable (MSI) and POLE mutants, classified as immune-adapted (-) or immune-*  
 407 *escaped (+) based on the presence of escape mechanisms (obtained from Lakatos et al<sup>28</sup>). B) Relationship*  
 408 *between Immune dN/dS values to TMB, following the same classification for patients as in A. C) Comparison*  
 409 *between immune dN/dS values for immune-escaped and immune-adapted MSS tumors using all or only*  
 410 *clonal mutations. D) Relationship between immune dN/dS values and the reported CD 8 T cell infiltration*  
 411 *following the same classification for patients as in A and B.*

412

413 Our theoretical model predicted that immune *dN/dS* will remain lower than one  
 414 when at large clone sizes in non-escaped patients. We expected that clonal  
 415 mutations may still hold the signature of negative selection (active before escape)  
 416 while subclonal mutations would be freely accumulating in immune-escaped  
 417 tumors. Consequently, when we compared immune *dN/dS* between immune-  
 418 adapted (escape-) and immune-escaped (escape+) MSS tumors, we observed  
 419 that immune-escaped tumors had immune *dN/dS* values significantly closer to 1  
 420 compared to immune-adapted tumors when using all mutations, but not when  
 421 using clonal mutations (0.88 versus 0.7, Wilcoxon signed rank test=0.0009, Fig



422 4C). In the case of immune-adapted tumors, the Immune  $dN/dS$  when using all  
423 or clonal mutations remained similar (0.68 versus 0.70 immune  $dN/dS$ ) while  
424 immune-escaped tumors had a significantly higher immune  $dN/dS$  when using all  
425 mutations (0.88 versus 0.66 immune  $dN/dS$ , P Value=0.007) (Fig S11).

426

427 To validate that the strength of immune-mediated negative selection depends on  
428 immune activity, we compared the patient specific immune  $dN/dS$  to the CD8 T  
429 cell infiltration (Fig 4D). We found a significant association between immune  
430 activity and CD8 T cells in immune-adapted MSS tumors (P Value = 0.018),  
431 reaffirming that native HLA binding regions hold information on the strength of  
432 immune selection elicited by CD 8 T cells. Interestingly, MSI tumors without an  
433 annotated escape mechanism did not follow this pattern suggesting that these  
434 tumors may have an unknown escape mechanism. These results highlight the  
435 importance of understanding the evolutionary dynamics of tumors under  
436 immunoediting and provide a theoretical explanation of why tumors with high  
437 mutation burden are better candidates for immunotherapy. Such tumors have an  
438 overall higher tumor immunogenicity that can be quantified using  $dN/dS$  in the  
439 immunopeptidome.

440

#### 441 **Immune-escaped tumors have better response to immunotherapy than** 442 **immune-adapted tumors**

443 To finally address the clinical importance of escape mutations and immune  $dN/dS$   
444 as a surrogate of tumor immunogenicity, we analysed 308 metastatic cases  
445 subjected to immunotherapy with checkpoint inhibitors mainly with Ipilimumab,  
446 Nivolumab, Ipi+Nivo, and Pembrolizumab from the Hartwig Medical Foundation  
447 cohort<sup>4</sup> (Fig 5A). The specimens were sequenced before treatment was started.  
448 Following RECIST guidelines patients were classified into complete and partial  
449 response and into progressive or stable disease (Methods). There were 78  
450 responders recorded (Partial or complete response) and 229 non-responders  
451 (Progressive or Stable disease). Due to the unavailability of patient specific HLA,  
452 we calculated immune  $dN/dS$  using HLA-A0201 and observed a lower immune  
453  $dN/dS$  for non-responders compared to responders, suggesting that patients with

454 no response to immunotherapy were already adapted to the action of immune  
455 response (Fig 5B). Next, we assembled a list of escape genes associated to the  
456 immune response and further classified patients into immune-escaped and non-  
457 escaped (Methods). Given that only genomic data was available for this cohort,  
458 we could only classify patients into genetic escape and not into other immune  
459 evasion events, such as overexpression of immune checkpoint inhibitors. We  
460 found that the proportion of responders with a genetic escape mechanism was  
461 significantly higher compared to non-responders (Chi-square P value = 0.001,  
462 Fig 5C), indicating that escape mechanisms were independently associated to  
463 the clinical response during immune checkpoint therapy.

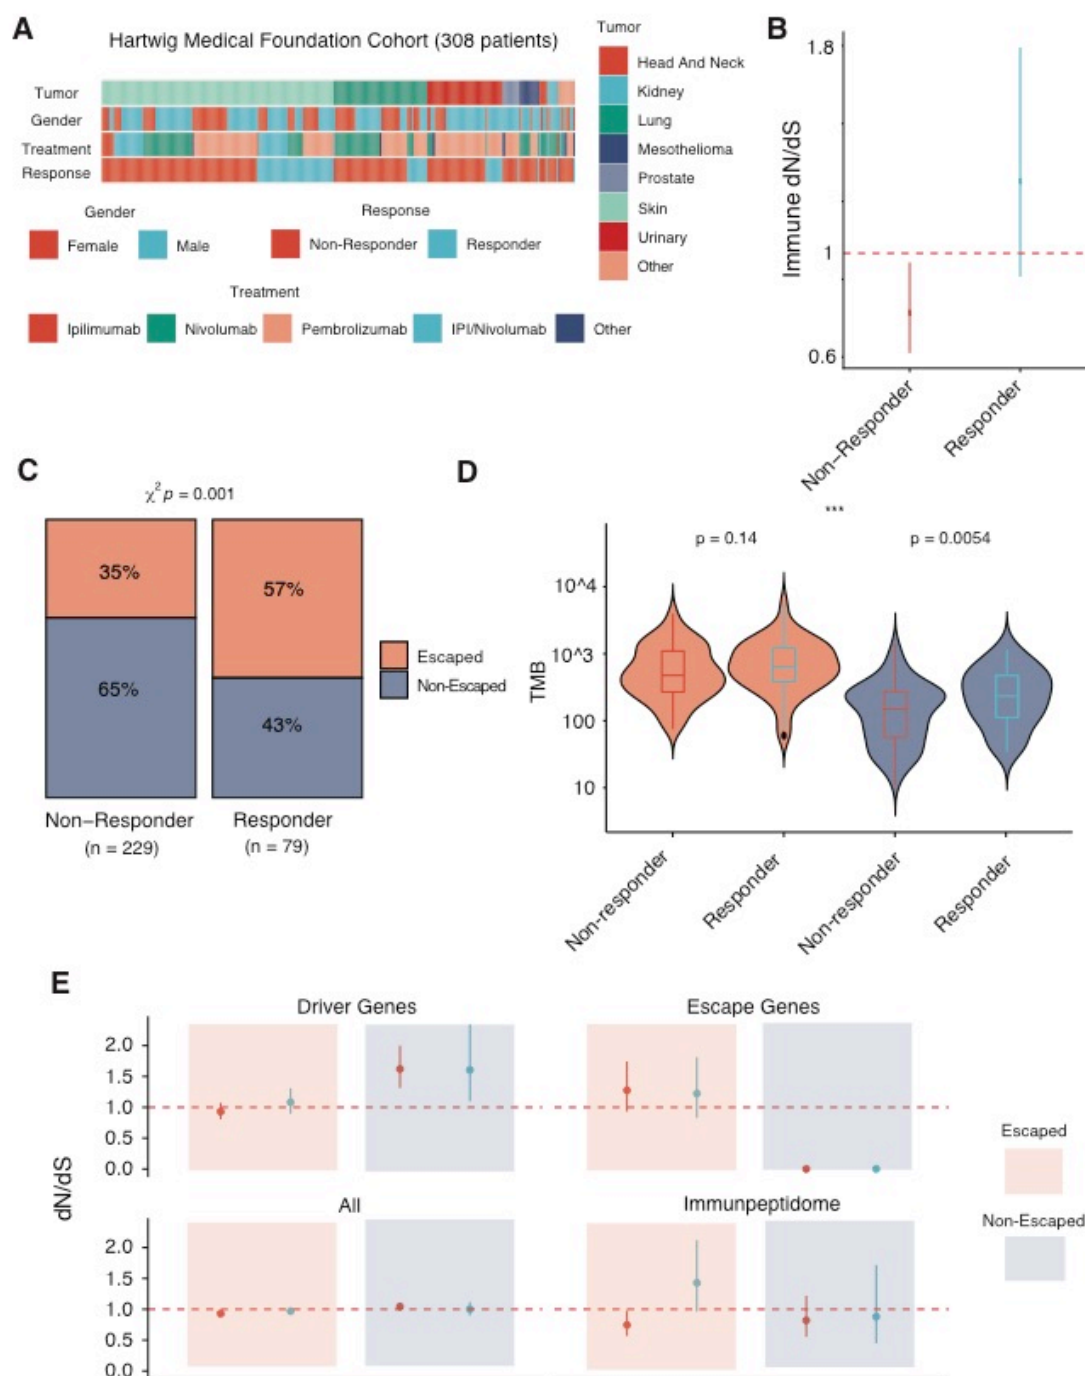

464

465 *Figure 5. Patient specific analysis of colorectal (CRC), stomach (STAD) and uterine cancer (UCEC) using*  
 466 *immune dN/dS. A) Tumor mutation burden (TMB) for different subtypes of cancers, including Microsatellite*  
 467 *Stable (MSS), Microsatellite Instable (MSI) and POLE mutants, classified as immune-adapted (-) or immune-*  
 468 *escaped (+) based on the presence of escape mechanisms (obtained from Lakatos et al<sup>28</sup>). B) Relationship*  
 469 *between Immune dN/dS values to TMB, following the same classification for patients as in A. C) Comparison*  
 470 *between immune dN/dS values for immune-escaped and immune-adapted MSS tumors using all or only*  
 471 *clonal mutations. D) Relationship between immune dN/dS values and the reported CD 8 T cell infiltration*  
 472 *following the same classification for patients as in A and B.*

473

474 Given that tumor mutation burden (TMB) is the current FDA-approved prognostic  
 475 marker of immunotherapy, we compared TMB between responders and non-

476 responders. As expected, we found that responders had a significantly higher  
477 TMB than non-responders before the treatment (Fig S12A, P-value =  $9.8 \times 10^{-6}$ , U  
478 Mann Whitney). In parallel, we looked at TMB between escape and non-escaped  
479 patients and found that escaped patients had also a significantly higher TMB  
480 compared to non-escaped (Fig S12B, P-Value <  $2.2 \times 10^{-16}$ , U Mann Whitney). We  
481 also explored if TMB was different within escaped and non-escaped groups  
482 separated by response. We found that TMB was significantly higher for  
483 responders among the non-escaped group (P Value=0.0054, U Mann Whitney)  
484 but not different among escaped patients (P value=0.14, U Mann Whitney) (Fig  
485 5D). The fact that, among non-escaped patients, responders had higher TMB,  
486 suggest that a group of responders had an escape mechanism that was not  
487 considered in our classification. This is expected given that we did not consider  
488 all possible escape mechanisms such loss of HLA heterozygosity<sup>33</sup>, epigenetic  
489 escape such as transcriptional silencing by changes in methylation<sup>34</sup>, or extrinsic  
490 factors such as the accumulation of dysfunctional T cells<sup>53</sup>, all mechanisms of  
491 immune evasion recently described in the literature.

492

493 Finally, we calculated  $dN/dS$  for driver, global, escape, and immune regions in  
494 these four groups (Fig 5E). We found that the driver  $dN/dS$  was positive for non-  
495 escaped tumors as expectedly, but surprisingly neutral for immune-escaped  
496 tumors. The escape  $dN/dS$  showed signals of positive selection for escaped  
497 patients and given that no nonsynonymous escape mutations were present in  
498 non-escaped patients, the escape  $dN/dS$  was zero. The global  $dN/dS$  was  
499 consistently close to one for all groups. Importantly, among escaped patients,  
500 while the TMB was not different between responders and non-responders (Fig  
501 5D), the immune  $dN/dS$  of non-responders was lower than one and lower than  
502 the immune  $dN/dS$  of responders. Ultimately, this validates immune-adaptation  
503 in non-responders showing less neoantigens and therefore low levels of tumour  
504 immunogenicity for immunotherapies to have an effect.

505

506 Overall, our results highlight the importance of properly stratifying patients based  
507 on escape mechanisms and immune  $dN/dS$  for a correct interpretation of the

508 evolutionary dynamics of tumors. In the future, these genomic based  
509 classification in combination with current standard practices, could be used as  
510 prognostic biomarkers for checkpoint inhibitor immunotherapies<sup>54</sup>.

511

## 512 **Discussion**

513 The remarkable clinical response demonstrated by immune checkpoint inhibitors  
514 (ICIs) has led to a growing interest in understanding the interactions between  
515 cancer and immune cells<sup>33,35,55–57</sup>. Although immunoediting is widely recognized  
516 as an evolutionary process that selects for clones with low immunogenicity or  
517 clones with an escape mechanism, its dynamics in the context of carcinogenesis  
518 and response to treatment are poorly understood. During immunoediting, growing  
519 cells are subjected to immune-mediated negative selection, shaping the  
520 landscape of mutations observed in cancer. However, negative selection in  
521 cancer has been a controversial topic<sup>15,16,58</sup>. While some studies have shown  
522 evidence of an association between immune activity and selective  
523 pressures<sup>8,34,51,55,59</sup>, others have claimed that there is a lack of evidence to prove  
524 this relationship<sup>16</sup>. Given that several studies have applied  $dN/dS$  as a metric of  
525 selection in cancer and in normal tissue<sup>7,8,60–63</sup>, we aimed to prove the use of  
526  $dN/dS$  in the immunopeptidome as a proxy of tumor immunogenicity and as a  
527 potential biomarker of immunotherapeutic response. In brief, we show that  
528 immune  $dN/dS$  quantifies the extent of negative selection exerted by the immune  
529 system and how levels of tumor immunogenicity measured by immune  $dN/dS$  can  
530 be used as a genomic biomarker for response to immunotherapy.

531

532 We first show the evolutionary dynamics of tumorigenesis under two radically  
533 different outcomes of immunoediting, immune-adaptation and immune-escape.  
534 Such distinction is a key feature of cancer evolution and has profound clinical  
535 implications. Immune-adapted tumors can only emerge in tissues where the  
536 immune system can exert a selective pressure, suggesting that tissues with a  
537 high capacity of immune recognition (immune-competent) are more likely to  
538 generate clones with a depletion of immunogenic mutations if the probability of  
539 escape is low (i.e. a low mutation rate). A lower number of neoantigens could

540 allow tumors to grow in both low and high immunogenic tissues, potentially  
541 making them more aggressive when colonizing new niches. Supporting our  
542 hypothesis, a recent study of longitudinal recurrence of metastasis reported a  
543 more aggressive phenotype in metastatic deposits that had higher levels of  
544 immune-selection<sup>55</sup>. However, whether tumor cells growing in immune-  
545 competent tissues are more likely to colonize new niches and how long it takes  
546 those tumor cells to readapt or to find a novel escape mechanism, as has been  
547 previously observed in mice models<sup>31,64</sup>, remains a challenging question.

548

549 Our immunoediting model predicts that immune-adapted tumours have an overall  
550 low tumor immunogenicity and will be less likely to respond to ICIs regardless of  
551 tumor mutation burden status (TMB). TMB has been regarded as a measure of  
552 tumor immunogenicity and is the current FDA-approved prognostic biomarker  
553 used to enrol patients for ICI treatment. However, TMB does not capture the full  
554 evolutionary history of the tumor and several patients do not respond despite their  
555 TMB status. In addition, a recent study has shown that mismatch repair-proficient  
556 colorectal cancers can also achieve clinical response<sup>44</sup>. Motivated by this, we  
557 propose that immune  $dN/dS$  can be used, in addition to TMB and escape  
558 mechanisms, to stratify patients into adapted and escaped. As evidence of this,  
559 we demonstrate that in a metastatic cohort, non-responders have an immune  
560  $dN/dS$  lower than one prior to immunotherapy and are thus immune-adapted,  
561 whereas responders have immune  $dN/dS$  values of one, and are more likely to  
562 be immune-escaped.

563

564 In conclusion, our study reflects the importance of understanding the evolutionary  
565 dynamics of immunoediting during tumor evolution and how immune selection  
566 edits the genome of tumor cells. Differentiating between immune adapted and  
567 immune escaped tumors is a key factor when predicting which patients will benefit  
568 from immunotherapies. In the future, we believe that immune  $dN/dS$  can be used  
569 as read-out of tumor immunogenicity, that, in combination with other prognostic  
570 measurements, can be used to predict response to immunotherapy.

571

## 572 References

- 573 1. Nowell, P. C. The clonal evolution of tumor cell populations. *Science (80-. )*. **194**, 23–28 (1976).
- 574 2. Greaves, M. & Maley, C. C. Clonal evolution in cancer. *Nature* **481**, 306–313 (2012).
- 575 3. Stratton, M. R., Campbell, P. J. & Futreal, P. A. The cancer genome. *Nature* **458**, 719–724 (2009).
- 576 4. Priestley, P. *et al.* Pan-cancer whole-genome analyses of metastatic solid tumours. *Nature* **575**, 210–216
- 577 (2019).
- 578 5. Martincorena, I. *et al.* Somatic mutant clones colonize the human esophagus with age. **3879**, 1–14 (2018).
- 579 6. Yokoyama, A. *et al.* Age-related remodelling of oesophageal epithelia by mutated cancer drivers. *Nature* **1**
- 580 (2019). doi:10.1038/s41586-018-0811-x
- 581 7. Martincorena, I., Raine, K. M., Davies, H., Stratton, M. R. & Campbell, P. J. Universal Patterns of Selection in
- 582 Cancer and Somatic Tissues. *Cell* **171**, 1029–1041.e21 (2017).
- 583 8. Zapata, L. *et al.* Negative selection in tumor genome evolution acts on essential cellular functions and the
- 584 immunopeptidome. *Genome Biol.* **19**, 67 (2018).
- 585 9. Weghorn, D. & Sunyaev, S. Bayesian inference of negative and positive selection in human cancers. *Nat*
- 586 *Genet* **49**, 1785–1788 (2017).
- 587 10. López, S. *et al.* Whole Genome Doubling mitigates Muller’s Ratchet in Cancer Evolution. 1–38 (2019).
- 588 doi:10.1101/513457
- 589 11. Davis, A., Gao, R. & Navin, N. Tumor evolution: Linear, branching, neutral or punctuated? *Biochim. Biophys.*
- 590 *Acta - Rev. Cancer* **1867**, 151–161 (2017).
- 591 12. Williams, M. J., Werner, B., Barnes, C. P., Graham, T. A. & Sottoriva, A. Identification of neutral tumor
- 592 evolution across cancer types. *Nat Genet* **48**, 238–244 (2016).
- 593 13. Heide, T. *et al.* Reply to ‘Neutral tumor evolution?’ *Nat. Genet.* **50**, 1633–1637 (2018).
- 594 14. Tarabichi, M. *et al.* Neutral tumor evolution? *Nat. Genet.* **50**, 1630–1633 (2018).
- 595 15. Bakhoun, S. F. & Landau, D. A. Cancer Evolution: No Room for Negative Selection. *Cell* **171**, 987–989 (2017).
- 596 16. Van den Eynden, J., Jiménez-Sánchez, A., Miller, M. L. & Larsson, E. Lack of detectable neoantigen depletion
- 597 signals in the untreated cancer genome. *Nat. Genet.* (2019). doi:10.1038/s41588-019-0532-6
- 598 17. Nordling, C. O. A new theory on the cancer-inducing mechanism. *Br. J. Cancer* **7**, 68 (1953).
- 599 18. Tomasetti, C., Marchionni, L., Nowak, M. A., Parmigiani, G. & Vogelstein, B. Only three driver gene mutations
- 600 are required for the development of lung and colorectal cancers. *Proc Natl Acad Sci U S A* **112**, 118–123
- 601 (2015).
- 602 19. Temko, D., Tomlinson, I., Severini, S., Schuster-Boeckler, B. & Graham, T. The effects of mutational process
- 603 and selection on driver mutations across cancer types. *bioRxiv* 149096 (2017). doi:10.1101/149096
- 604 20. Williams, M. J. *et al.* Quantification of subclonal selection in cancer from bulk sequencing data. *Nat. Genet.* 1–9
- 605 (2018). doi:10.1038/s41588-018-0128-6
- 606 21. Williams, M. J. *et al.* Measuring the distribution of fitness effects in somatic evolution by combining clonal
- 607 dynamics with dN/dS ratios. *Elife* **9**:e48714, 661264 (2020).
- 608 22. Watson, C. J. *et al.* The evolutionary dynamics and fitness landscape of clonal hematopoiesis. *Science (80-. )*.
- 609 **367**, 1449–1454 (2020).
- 610 23. McFarland, C. D., Korolev, K. S., Kryukov, G. V., Sunyaev, S. R. & Mirny, L. A. Impact of deleterious passenger
- 611 mutations on cancer progression. *Proc Natl Acad Sci U S A* **110**, 2910–2915 (2013).
- 612 24. McFarland, C. D., Mirny, L. A. & Korolev, K. S. Tug-of-war between driver and passenger mutations in cancer
- 613 and other adaptive processes. *Proc Natl Acad Sci U S A* **111**, 15138–15143 (2014).
- 614 25. Van den Eynden, J. & Larsson, E. Mutational Signatures Are Critical for Proper Estimation of Purifying
- 615 Selection Pressures in Cancer Somatic Mutation Data When Using the dN/dS Metric. *Front Genet* **8**, 74
- 616 (2017).
- 617 26. Persi, E., Wolf, Y. I., Leiserson, M. D. M., Koonin, E. V & Ruppin, E. Criticality in Tumor Evolution and Clinical
- 618 Outcome. (2018).
- 619 27. Pyatnitskiy, M., Karpov, D., Poverennaya, E., Lisitsa, A. & Moshkovskii, S. Bringing Down Cancer Aircraft:

- 620 Searching for Essential Hypomutated Proteins in Skin Melanoma. *PLoS One* **10**, e0142819 (2015).
- 621 28. Lakatos, E. *et al.* Evolutionary dynamics of neoantigens in growing tumours. 1–41 (2019). doi:10.1101/536433
- 622 29. Dunn, G. P., Bruce, A. T., Ikeda, H., Old, L. J. & Schreiber, R. D. Cancer immunoediting: from  
623 immunosurveillance to tumor escape. *Nature Immunology* **3**, 991–998 (2002).
- 624 30. Dunn, G. P., Old, L. J. & Schreiber, R. D. The immunobiology of cancer immunosurveillance and  
625 immunoediting. *Immunity* **21**, 137–148 (2004).
- 626 31. Schreiber, R. D., Old, L. J. & Smyth, M. J. Cancer Immunoediting : Integrating Suppression and Promotion.
- 627 32. Matsushita, H. *et al.* Cancer exome analysis reveals a T-cell-dependent mechanism of cancer immunoediting.  
628 *Nature* **482**, 400–404 (2012).
- 629 33. McGranahan, N. *et al.* Allele-Specific HLA Loss and Immune Escape in Lung Cancer Evolution. *Cell* **171**,  
630 1259–1271.e11 (2017).
- 631 34. Rosenthal, R. *et al.* Neoantigen-directed immune escape in lung cancer evolution. doi:10.1038/s41586-019-  
632 1032-7
- 633 35. Chowell, D. *et al.* Evolutionary divergence of HLA class I genotype impacts efficacy of cancer immunotherapy.  
634 *Nat. Med.* doi:10.1038/s41591-019-0639-4
- 635 36. Bräunlein, E. & Krackhardt, A. M. Identification and Characterization of Neoantigens As Well As Respective  
636 Immune Responses in Cancer Patients. *Front. Immunol.* **8**, 1–8 (2017).
- 637 37. Fritsch, E. F. *et al.* HLA-binding properties of tumor neopeptides in humans. *Cancer Immunol. Res.* **2**, 522–529  
638 (2014).
- 639 38. Charoentong, P. *et al.* Pan-cancer Immunogenomic Analyses Reveal Genotype-Immunophenotype  
640 Relationships and Predictors of Response to Checkpoint Blockade. *Cell Rep.* **18**, 248–262 (2017).
- 641 39. Bindea, G. *et al.* Spatiotemporal dynamics of intratumoral immune cells reveal the immune landscape in  
642 human cancer. *Immunity* **39**, 782–795 (2013).
- 643 40. Galon, J. *et al.* Towards the introduction of the ‘Immunoscore’ in the classification of malignant tumours. *J*  
644 *Pathol* **232**, 199–209 (2014).
- 645 41. Quezada, S. A., Peggs, K. S., Simpson, T. R. & Allison, J. P. Shifting the equilibrium in cancer immunoediting:  
646 From tumor tolerance to eradication. *Immunol. Rev.* **241**, 104–118 (2011).
- 647 42. Gajewski, T. F., Schreiber, H. & Fu, Y.-X. Innate and adaptive immune cells in the tumor microenvironment.  
648 *Nat Immunol* **14**, 1014–1022 (2013).
- 649 43. Dupage, M., Mazumdar, C., Schmidt, L. M., Cheung, A. F. & Jacks, T. Expression of tumour-specific antigens  
650 underlies cancer immunoediting. *Nature* **482**, 405–409 (2012).
- 651 44. Chalabi, M. *et al.* Neoadjuvant immunotherapy leads to pathological responses in MMR-proficient and MMR-  
652 deficient early-stage colon cancers. *Nat. Med.* (2020). doi:10.1038/s41591-020-0805-8
- 653 45. Durrett, R. & Duke, U. Branching Process Models of Cancer Multistage theory of cancer. (2014).
- 654 46. Gatenbee, C. *et al.* Macrophage-mediated immunoediting drives ductal carcinoma evolution : Space is the  
655 game changer. 1–15 (2019).
- 656 47. Williams, M. J., Sottoriva, A. & Graham, T. A. Measuring Clonal Evolution in Cancer with Genomics. *Annu.*  
657 *Rev. Genomics Hum. Genet.* **20**, annurev-genom-083117-021712 (2019).
- 658 48. Gejman, R. S. *et al.* Rejection of immunogenic tumor clones is limited by clonal fraction. *Elife* **7**, 1–22 (2018).
- 659 49. Yang, Z. & Nielsen, R. Estimating synonymous and nonsynonymous substitution rates under realistic  
660 evolutionary models. *Mol Biol Evol* **17**, 32–43 (2000).
- 661 50. Koebel, C. M. *et al.* Adaptive immunity maintains occult cancer in an equilibrium state. *Nature* **450**, 903–907  
662 (2007).
- 663 51. Rooney, M. S., Shukla, S. A., Wu, C. J., Getz, G. & Hacohen, N. Molecular and genetic properties of tumors  
664 associated with local immune cytolytic activity. *Cell* **160**, 48–61 (2015).
- 665 52. Le, D. T. *et al.* PD-1 Blockade in Tumors with Mismatch-Repair Deficiency. *N. Engl. J. Med.* **372**, 2509–2520  
666 (2015).
- 667 53. Ghorani, E. *et al.* tumour mutations in lung cancer. **1**, (2020).



- 668 54. Havel, J. J., Chowell, D. & Chan, T. A. The evolving landscape of biomarkers for checkpoint inhibitor  
669 immunotherapy. *Nat. Rev. Cancer* **19**, 133–150 (2019).
- 670 55. Angelova, M. *et al.* Evolution of Metastases in Space and Time under Immune Selection. *Cell* 1–15 (2018).  
671 doi:10.1016/j.cell.2018.09.018
- 672 56. Zhang, A. W. *et al.* Interfaces of Malignant and Immunologic Clonal Dynamics in Ovarian Cancer. *Cell* **173**,  
673 1755-1769.e22 (2018).
- 674 57. Abduljabbar, K. *et al.* Geospatial immune variability illuminates differential evolution of lung adenocarcinoma.
- 675 58. López, S. *et al.* Interplay between whole-genome doubling and the accumulation of deleterious alterations in  
676 cancer evolution. *Nat. Genet.* **52**, 283–293 (2020).
- 677 59. Zhang, A. W. *et al.* Interfaces of Malignant and Immunologic Clonal Dynamics in Ovarian Cancer. *Cell* 1–15  
678 (2018). doi:10.1016/j.cell.2018.03.073
- 679 60. Lee-Six, H. *et al.* The landscape of somatic mutation in normal colorectal epithelial cells. *Nature* **574**, 532–537  
680 (2019).
- 681 61. Muyas, F., Zapata, L., Guigó, R. & Ossowski, S. The rate and spectrum of mosaic mutations during  
682 embryogenesis revealed by RNA sequencing of 49 tissues. 1–19 (2019).
- 683 62. Benvenuto, M. *et al.* Tumor antigens heterogeneity and immune response-targeting neoantigens in breast  
684 cancer. *Semin. Cancer Biol.* 1–12 (2019). doi:10.1016/j.semcancer.2019.10.023
- 685 63. Zacharakis, N. *et al.* Immune recognition of somatic mutations leading to complete durable regression in  
686 metastatic breast cancer. *Nat. Med.* **24**, 724–730 (2018).
- 687 64. Koebel, C. M. *et al.* Adaptive immunity maintains occult cancer in an equilibrium state. **450**, 903–908 (2007).
- 688 65. Caravagna, G. *et al.* Model-based tumor subclonal reconstruction. 1–31 (2019).
- 689 66. Fay, M. P. Two-sided exact tests and matching confidence intervals for discrete data. *R J.* **2**, 53–58 (2010).

690

## 691 **Acknowledgements**

692 L.Z. is supported by the European Union’s Horizon 2020 research and innovation  
693 programme under the Marie Skłodowska-Curie Research Fellowship scheme  
694 (846614). A.S. is supported by the Wellcome Trust (202778/B/16/Z) and Cancer  
695 Research UK (A22909). We acknowledge funding from the National Institute of  
696 Health (NCI U54 CA217376) to A.S. and T.G. This work was also supported by  
697 a Wellcome Trust award to the Centre for Evolution and Cancer (105104/Z/14/Z).  
698 We thank Claire-Alix Garin and Marco Punta for support and discussion. This  
699 publication and the underlying study have been made possible partly on the basis  
700 of the data that Hartwig Medical Foundation and the Center of Personalised  
701 Cancer Treatment (CPCT) have made available to the study.

702

## 703 **Author contributions**

704 LZ conceived, designed, implemented and performed all analysis, GC supported  
705 with the model implementation, MW, EL, and BW provided support with the  
706 mathematical inferences of the model. KAJ provided bioinformatic support. TG

707 and AS supervised the project. LZ wrote the first draft of the manuscript. LZ, AS  
708 and TG wrote the final version of the manuscript with the help of all the authors.

709

## 710 **Competing interests**

711 The authors declare no competing interests.

712

## 713 **Data availability**

714 TCGA data was obtained from GDC portal and processed as described in<sup>13</sup>.  
715 Assembled list of escape mechanisms for COAD, READ and STAD and UCEC  
716 was obtained from Lakatos et al<sup>28</sup>. Hartwig Medical Foundation data was  
717 downloaded from Hartwig Data Portal. HBMR values of selection in the  
718 immunopeptidome were obtained from the supplementary material in Van Den  
719 Eynden et al<sup>16</sup>. Normalized scores for immune cell infiltration was obtained from  
720 Rooney et al<sup>51</sup>.

721

## 722 **Code Availability**

723 SOPRANO is freely available at [github.com/luisgls/SOPRANO](https://github.com/luisgls/SOPRANO). Simulator of  
724 stochastic branching process for immunoediting is available at  
725 [github.com/luisgls/dNdSSimulator](https://github.com/luisgls/dNdSSimulator) upon request. All figures are available as a  
726 markdown file.

727

## 728 **Methods**

### 729 **1.0 Evolutionary model of tumorigenesis under immunoediting**

#### 730 **1.1 Computational model**

731 We have developed a discrete-time non-spatial stochastic branching process of  
732 somatic evolution. It models the acquisition of somatic mutations and their  
733 associated effect on the phenotype of single cells. The model can be initialized  
734 with any number of wild-type single cells and a set of initial parameters described  
735 in supplementary table 1A.

736

#### 737 **1.2 Cell division process**

738 The model simulates cellular proliferation starting from  $x_0$  identical initial cells  
739 available at time  $t_0 = 0$ , that divide synchronously; each time-step therefore is  
740 represented in units of tumour doublings or generations, as in earlier works<sup>47</sup>.

741

742 At every time-step every single cell (SC) in the model undergoes a stochastic  
743 process with a probability that depends on a parameter  $p_i$ . The outcomes of this  
744 process are either zero, one, or two single cells in the model:

745

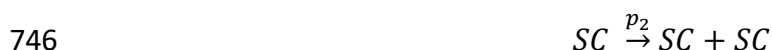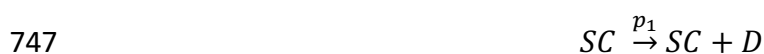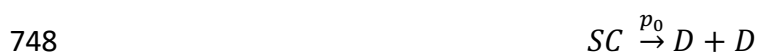

749

750 where  $p_0 + p_1 + p_2 = 1$  and D denotes “dead” cells. We consider death as any  
751 process that removes the cell from the dividing population, such as apoptosis,  
752 senescence, quiescence, or differentiation. To simplify the possible outcomes of  
753 the model, we consider  $p_1 = 0$ . Thus, our branching process consists only of no  
754 division (no offspring) or a successful cell division (two daughter cells), that is  
755  $p_0 + p_2 = 1$ . Given that  $p_0 = 1 - p_2$ , we can define the probability of survival  
756  $p_2 = \Delta$  as the parameter of fitness for each single cell. In the case of a neutral  
757 branching process and at the initial state of the simulation (time  $t_0$ ) the probability  
758 of cell division is equal to the probability of cell death/differentiation for each single  
759 cell ( $\Delta = 0.5$ ).

760

761 We can translate this parameter  $\Delta$  into a birth death process with  $b/d = \omega$  using:

762

$$763 \quad \omega = 2 * p_2 + 1 * p_1 + 0 * p_0$$

$$764 \quad \omega = 2 * \Delta$$

765

[2]

$$766 \quad \omega = b/d$$

$$767 \quad b/d = 2 * \Delta$$

768

769 when  $\Delta = 0.5$  the birth death ratio  $b/d = 1$ .

770

771 The population grow exponentially when the probability of division ( $\Delta$ ) is 1. The  
772 probability of survival  $\Delta$  used as a phenotype allow us to define a driver clone. A  
773 driver clone is a set of cells from the same evolutionary lineage which have the  
774 same  $\Delta$  across them. This implies that they all have a shared set of mutations  
775 (very few or all) and the same survival probability. We also define an  
776 immunogenic clone, defined by the presence of an ancestral cell that acquired at  
777 least one immunogenic mutation.

778

### 779 **1.3 Cell genotypes and phenotypes.**

780

781 The genotype of each single cell is implemented as a vector storing the following  
782 information:

783

- 
- 784 • Number of nonsynonymous mutations in driver, immune, escape, and  
785 passenger regions of the coding genome.
  - 786 • Number of synonymous mutations in driver, immune and passenger  
787 regions of the coding genome.
- 

788

789 At every successful cell division, each cell inherits the genotype from the parental  
790 cell, which is further modified by acquiring a new set of mutations. The number  
791 of new mutations is given by a Poisson distribution with mean  $u * L$  with  $L = 50 * 10^6$ ,  
792  $u$  is the mutation rate per bp per cell division, and  $L$  is the length of the  
793 coding genome.

794

795 The phenotype of each single cell is implemented as a vector storing the following  
796 information:

797

- 
- 798 • Fitness (probability of successful cell division) and strategy (passenger,  
799 driver, immunogenic or escape),
- 

800

801 These phenotypes are the outcome of mutations present in the genotype vector.  
802 To estimate the target size and thus the vector of probabilities for passenger,  
803 driver, immunogenic, and escape mutations we used prior information and also  
804 explored different values. All tested values are described in supplementary table  
805 1B.

806

#### 807 **1.4 Cycle conditions**

808 Our model requires the input of several parameters described in supplementary  
809 Table 1. We performed several simulations to account for the different phases  
810 described in figure 1. The parameters for the simulations are described in  
811 supplementary table 1B.

812

#### 813 **Mutation rate**

814 Specifically, for MSS cases, we used a mutation rate per pb per cell division of  
815  $10^{-8}$ . This value is a composite between the polymerase error and the DNA  
816 proofreading correction efficiency. For MSI and POLE cases we increased this  
817 value in one and two orders of magnitude respectively.

818

819 Initially, we estimated the probability of hitting a driver mutation (1%) based on  
820 the number of driver genes identified in a recent study using a pancancer dataset  
821 (~200 out of 20000 genes)<sup>7</sup>. We used 5% of the coding genome as immunogenic  
822 based on our recent analysis of immunogenic mutations<sup>28</sup> and based on the  
823 length of all possible 9-mers defined as strong binders by NetMHCpan. The  
824 proportion of escape sites in the coding genome is unknown, thus we simulated  
825 different proportions ranging from 0.01% to 5%. In addition, we defined  
826 nonsynonymous mutations as: a) passenger mutations that do not have any  
827 effect on the phenotype, b) driver mutations increasing the probability of survival,  
828 c) immunogenic mutations that may elicit an immune response, d) escape  
829 mutations allowing the cell to hide from an immune attack. We assume that all  
830 synonymous mutations accumulate neutrally in the genome and define three  
831 types of synonymous a) synonymous mutations in neutral regions, b) in driver  
832 regions, and c) in the immunopeptidome. To simulate the dependency of the

833 nonsynonymous to synonymous mutation ratio, dN/dS values, for global, driver  
834 and immune regions, we fixed the probability of synonymous mutations as 1/3 of  
835 the probability of the nonsynonymous mutations in the same locus. All these  
836 probabilities sum to one.

837

838 Then, each time a cell divides, each daughter cell inherits the parental genotype  
839 and an additional set of nonsynonymous and synonymous mutations based on  
840 the probability vector defined. Our model assumes infinite-sites and no -back  
841 mutation as used in previous studies<sup>65</sup>. Our model records the number of  
842 mutations for each mutation type, the probability vector for each of those  
843 mutations, the probability of survival and the probability of immune attack over  
844 time. We also store the parental relationship and we assign a new clone id only  
845 when the new genotype includes nonsynonymous driver different from the  
846 parental phenotype.

847

848 We stopped the simulation after 100 generations, consistent with the maximum  
849 number of cell divisions allowed by telomere shrinking, or when the population  
850 size reached a specific carrying capacity (2000 cells).

851

## 852 **1.4 Mutation effects**

### 853 **Phenotype 1 - Proliferation dynamics**

854 We have developed a flexible framework to account for different models of fitness  
855 effects of driver mutations. We chose a model based on that to date we have  
856 mostly seen tumors having between 2-10 drivers, therefore at equilibrium we  
857 expect to reach an average of 5 clones each carrying a driver event or 1 clone  
858 carrying 5 driver events. Thus, we modelled the fitness increase by a driver event  
859 as a Gompertz function where driver events give different selective advantages  
860 based on the order of acquisition given by:

861

$$862 \quad S(d) = 0.5 * e^{-b * e^{-cd}}$$

863

864 where  $b$  defines the displacement scale parameter of the Gompertz function,  $c$   
865 defines the scale parameter on the fitness effect for each driver, and  $d$  is the  
866 number of driver events. We sample  $b$  from a normal distribution with mean 5 and  
867  $c$  has a fixed value of 1.

868

869 Finally, at each time point each cell has a probability of survival defined by:

870

$$871 \quad \Delta = 0.5 + S(d)$$

872

873 We must emphasize that the choice on these functions is perhaps one of the  
874 most important open questions in the field of cancer evolution. The fitness effects  
875 of combinations of multiple drivers (epistasis), the proportion of mutated sites  
876 leading to an increase/decrease of a selective advantage, and whether there is  
877 an upper boundary for the fitness increase remain largely unsolved and it was  
878 not the scope of this work. Here, we aimed to explore the effects of the immune  
879 system, the selective pressures and the emergence of escape mutations on a  
880 single unifying framework of tumor evolution.

881

## 882 **Phenotype 2 - Immunoediting:**

883 To model the effect of the immune system during somatic evolution we assume  
884 two possible scenarios.

885

886 In the first, we allow cells to accumulate immunogenic mutations based on the  
887 size of the immunogenic genome and the mutation rate. Each immunogenic  
888 mutation will be detected by the immune system at an immune-mediated cell  
889 death rate of  $P_{IS}$  that will remove the immunogenic cell. This rate can be seen as  
890 the healthiness of the immune system or the capacity of T-cell recognition based  
891 on the diversity of the TCR repertoire (with 0 for immunosuppressed to 1 for  
892 immunocompetent, alternatively this can be seen as low recognition or high  
893 recognition potential by TCRs). By simplifying this value to an external probability  
894 independent of the genome, it allows us to model the effect of the  
895 microenvironment.

896

897 In the second, we define a function that at every generation calculates how many  
898 cells in a given clone are immunogenic (at least one neoantigen) and if this  
899 number is greater than a selected cut-off value (50 cells in our model), we kill all  
900 cells from that clone given a certain probability (defined previously as  $P_{IS}$ ). An  
901 immunogenic cell carries at least one immunogenic mutation and have not  
902 acquired an escape mutation. When a cell acquires an escape mutation, the  
903 immune system will no longer attack this cell.

904

### 905 **1.5 dN/dS computation**

906 To estimate the dN/dS ratio we fixed the initial probabilities of occurrence of  
907 nonsynonymous mutations to be three times higher than the occurrence of  
908 synonymous mutations, as naturally observed in the coding portion of the human  
909 genome.

910

911 In general, in the first cellular divisions the number of synonymous mutations is  
912 close to 0 for many cells making the calculation of dN/dS implausible (infinite).  
913 We calculated the dN/dS for all mutations (global dN/dS), driver mutations (driver  
914 dN/dS) and immunogenic mutations (immune dN/dS) by adding up the observed  
915 counts in the alive cells at a given time  $t$ .

916

$$917 \quad \text{global} \frac{dN}{dS} = \frac{\sum ns\_passenger + \sum ns\_driver + \sum ns\_immunogenic + \sum ns\_escape}{3 * (\sum s\_passenger + \sum s\_driver + \sum s\_immunogenic + \sum s\_escape)}$$

918

$$919 \quad \text{driver} \frac{dN}{dS} = \frac{\sum ns\_driver}{3 * \sum s\_driver}$$

920

$$921 \quad \text{Immune} \frac{dN}{dS} = \frac{\sum ns\_immunogenic}{3 * \sum s\_immunogenic}$$

922

### 923 **1.6 Frequency dN/dS**

924 To estimate the dN/dS ratio using a specific mutation frequency cut off we  
925 simulated sequencing by giving a mutation ID to each new mutation acquired  
926 during the stochastic branching process. We determine the cell-specific mutation  
927 by implementing an algorithm that walks along the lineage of a cell and



928 concatenate all inherited mutations. We build a matrix of all alive cells and  
929 mutations at the last time point. We then were able to filter out variants present  
930 in less than any predefined threshold. For the driver section we used 0.01%, 1%,  
931 2%, 3%, 4%, 5%, 10%, 25%, and 50% as frequency cut-offs. For the immune  
932 section we used 0.1%, 1%, 5%, 10% and 50% as frequency cut-offs. To estimate  
933 dN and dS we assigned each inherited mutation a unique id. Given that each  
934 mutation has two labels, a first label defined as 1) nonsynonymous and  
935 synonymous, and a second label defined as a 2) passenger, driver and  
936 immunogenic. This allowed us to calculate a global, driver, and immune dN/dS  
937 accordingly. Then, each simulation consisted of N number of cells with a specific  
938 number of nonsynonymous and synonymous driver, immunogenic, and  
939 passenger mutations.

940

#### 941 **1.7 dN/dS confidence Intervals for frequency or cancer cell fraction cut-offs**

942 When performing the analysis using frequency cut-offs, we pulled simulations  
943 together similar to what is done in cohort studies when all nonsynonymous and  
944 synonymous mutations are pulled together. To estimate the confidence interval  
945 for this analysis, we used the `rateratio.test` function from R package `rateratio`.  
946 This function calculates the p-value and the confidence interval for the rate of two  
947 Poisson ratios. It uses the uniformly most powerful ratio test available for R<sup>66</sup>.

948

#### 949 **2.0 TCGA Data**

950 We first obtained somatic calls of TCGA data from GDC. This dataset consisted  
951 of 10202 samples across 33 tumors types. We then selected 19 tumor types  
952 tumor types that had been analysed in Rooney et al<sup>51</sup> in order to compare our  
953 results of immune dN/dS to the immune cell scores. Rooney et al provided the  
954 per patient values of several normalized scores for immune cells. We calculated  
955 the median value for each score within each tumor type. The final list analysed  
956 consisted of 8543 samples across 19 tumor types. TCGA data was then re-  
957 annotated using ensembl-VEP release 89. COAD (Colon adenocarcinoma) and  
958 READ (Rectum Adenocarcinoma) were merged into CRC.

959

960 HLA-binding Mutation Ratios (HBMR) and simulated HBMRs were obtained from  
961 the supplementary material in Van Den Eynden et al<sup>16</sup> available for 19 tumor  
962 types. Hartwig somatic calls and metadata were obtained from Hartwig Medical  
963 Foundation under license agreement DR-075.

964

## 965 **2.1 Selection On PRotein ANotated regiOns, SOPRANO**

966 SOPRANO was developed on top of the method developed in Zapata et al 2018  
967 to calculate selection in VEP annotated files and is freely available in  
968 [github.com/luisgls/SOPRANO](https://github.com/luisgls/SOPRANO). It estimates dN/dS values in a target region (ON-  
969 target) and in the rest of the proteome (OFF-target) using a trinucleotide context  
970 correction (SSB192) or a 7-nucleotide context (SSB7). It allows the option to  
971 include or exclude cancer driver genes, as well as, randomizing the target region  
972 to calculate a background distribution of a matching size region. Given that it uses  
973 a set of Ensembl transcript identifiers and their respective FASTA file it allows  
974 calculation of dN/dS in any genome irrespective of the version. We ran  
975 SOPRANO on 33 tumor types and deposited the results for each tumor type in  
976 Synapse ([syn22149238](https://synapse.org/syn22149238)).

977

## 978 **2.2 Immunopeptidome and patient specific HLA**

979 We downloaded a set of protein coding transcripts with HGNC symbol from  
980 Ensembl Biomart. We obtained all transcript lengths and run bedtools  
981 makewindows to get all possible overlapping 9-mers. We then obtained the  
982 FASTA sequence for each of all 9-mer and run netMHCpan4 using a list of HLA-  
983 alleles. This list of HLA-alleles was restricted to those that have more than 1%  
984 population frequency in a list of 1277 samples from the 1000K cohort. We  
985 selected all possible strong binders which had a mean and a median expression  
986 above 1FPKM. We obtained expression values for different tissues from the  
987 human protein atlas (downloaded on 05/10/2018).

988

## 989 **3.0 Analysis of Metastatic cohort pre-immunotherapy from Hartwig Medical** 990 **Foundation**

991

992 We obtained the somatic mutation data from the Hartwig Medical Foundation  
993 cohort (HMF) under license agreement DR-075. The data we used for this  
994 manuscript consisted on 308 metastatic patients that underwent immunotherapy  
995 post-biopsy and that had recorded clinical response in "first response" column  
996 from the metadata. Mutation types that were not classified as synonymous,  
997 missense, start\_lost, stop gained, stop lost or frameshift mutation were excluded.  
998 We removed indels and reannotated SNVs following our pipeline to obtain high  
999 confidence calls for a predefined set of ensemble transcripts (~20000 genes). We  
1000 then rerun ensemble VEP using version 90 for Grch37 and parse the file using  
1001 VATools V1.0.0. We uploaded the final annotated file used for the rest of the  
1002 manuscript for each of the 308 patients to Synapse.

1003

1004 It is important to note that the raw clinical data was supplied by HMF and final  
1005 consistency checks are still to be performed. The response evaluations were not  
1006 performed as part of a clinical trial and the timing of the evaluations was variable.  
1007 We classified patients into responders and non-responders based on the first  
1008 response recorded after treatment was initiated. The group of responders  
1009 consisted of those that were labelled complete response (CR, 1 case), or partial  
1010 response (PR, 78 cases). Those that were labelled stable diseases (SD, 98  
1011 cases) or progressive disease (PD, 131 cases) were classified as non-  
1012 responders. To keep consistency with other studies, there were 79 cases with no  
1013 data, two cases classified as clinical progression, four cases classified as ND,  
1014 and 3 cases classified as Non-CR/Non-PD which were not included in the  
1015 analysis. The timing from biopsy to response was not included. There were no  
1016 other further classifications performed.

1017

1018 Escape genes were selected based on the list of Antigen Processing and  
1019 Presentation Machinery (hsa04612) download from KEGG. In addition, we  
1020 included escape genes used in Rosenthal et al<sup>34</sup>. We then classified responders  
1021 and non-responders into "escaped" if there was a missense or a truncating  
1022 mutation in one of these escape genes and into "adapted" otherwise.

1023

1024 All statistical tests were performed using R statistical language. Statistical tests  
1025 were performed using Wilcoxon rank-sum test for two distributions or Kruskal-  
1026 Willis test when more than two distributions were present using the R package  
1027 ggstatsplot.

1028

1029 We ran SSB192 ([github.com/luisgls/SSB-dNdS](https://github.com/luisgls/SSB-dNdS)) with default parameters to  
1030 determine gene and global dN/dS values and SOPRANO  
1031 ([github.com/luisgls/SOPRANO](https://github.com/luisgls/SOPRANO)) using the bed file provided in the package for  
1032 HLA-A0201 using 192-base pair correction. We calculated dN/dS for driver genes  
1033 using the list of 196 genes provided in Martincorena et al<sup>7</sup>. We calculated SSB-  
1034 dNdS and immune dN/dS in the four group categories. For the TCGA patient  
1035 specific SOPRANO analysis we used the 4-digit code HLA type for each gene  
1036 (HLA-A, HLA-B, and HLA-C). We concatenated all regions predicted to bind to  
1037 netMHCpan4.0 as strong binders in those genes that have a median expression  
1038 of more than 1FPKM calculated across the 33 TCGA cancer types.

---

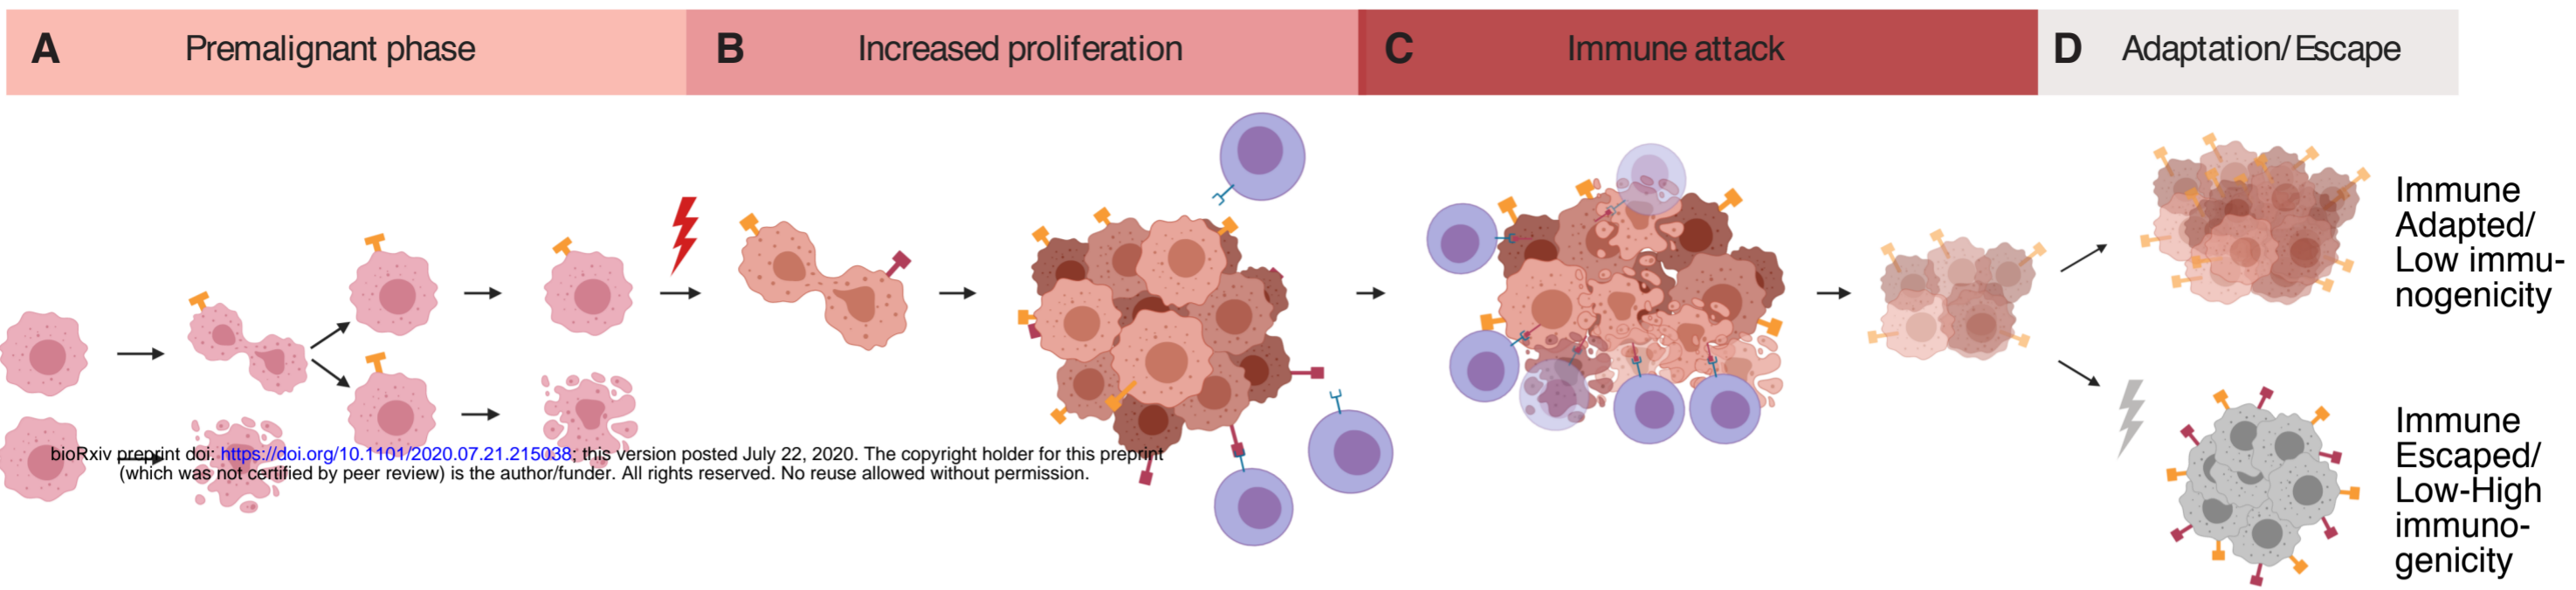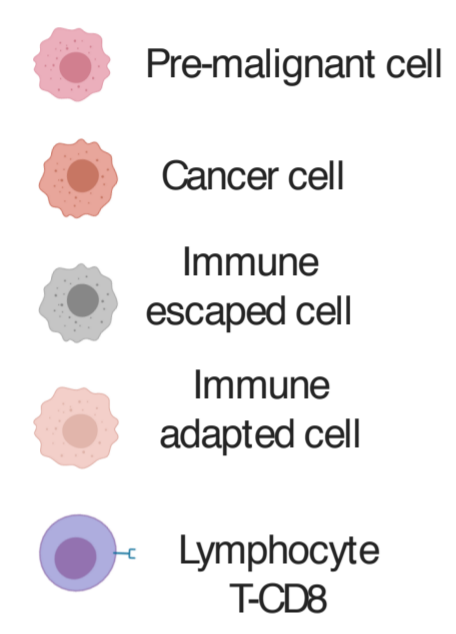

**E**

| Mutations   | Proportion |
|-------------|------------|
| Passenger   | ~85%- 90%  |
| Driver      | 0.1%- 1%   |
| Immunogenic | 1%- 10%    |
| Escape      | 0.05%- 5%  |

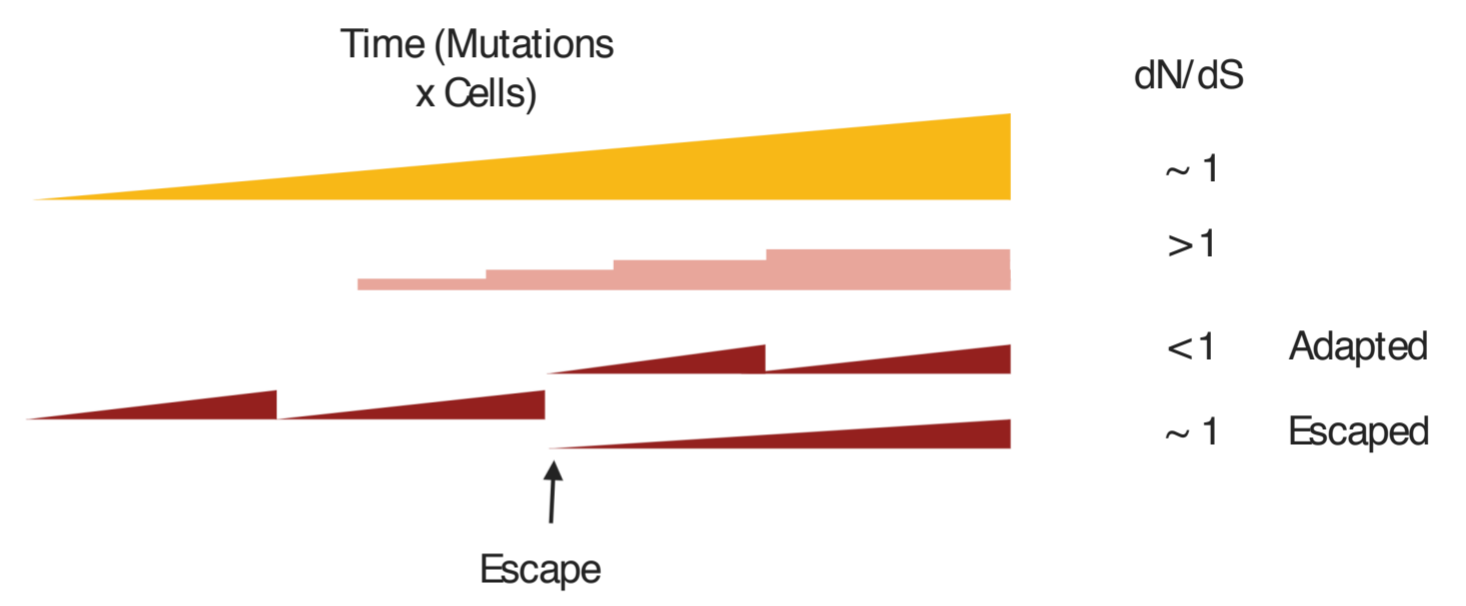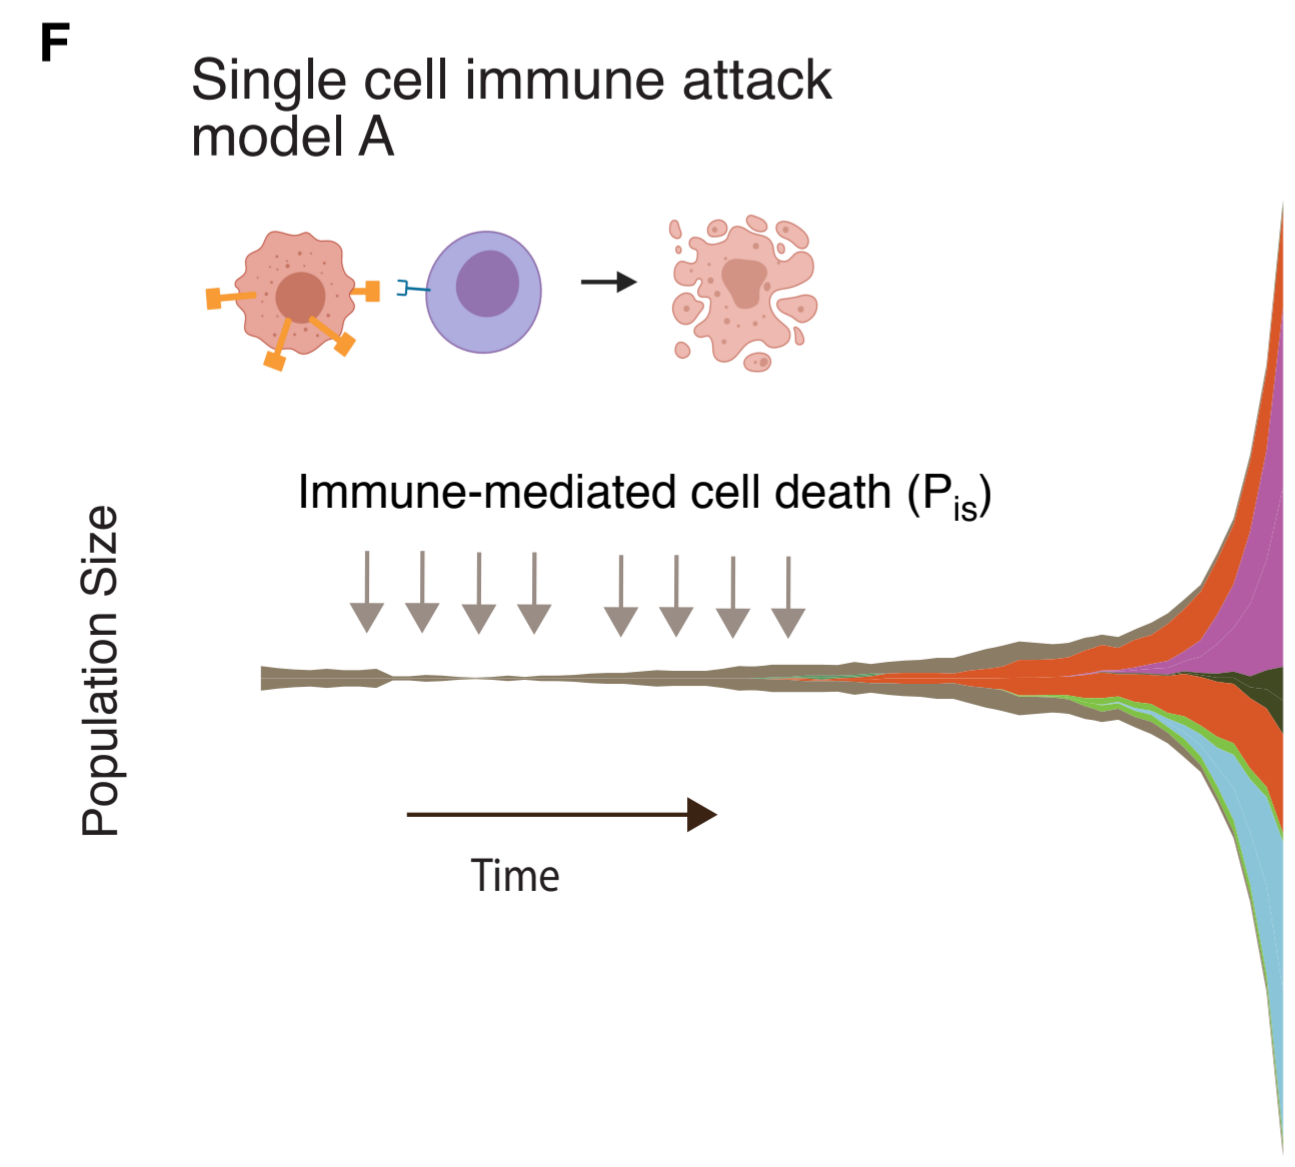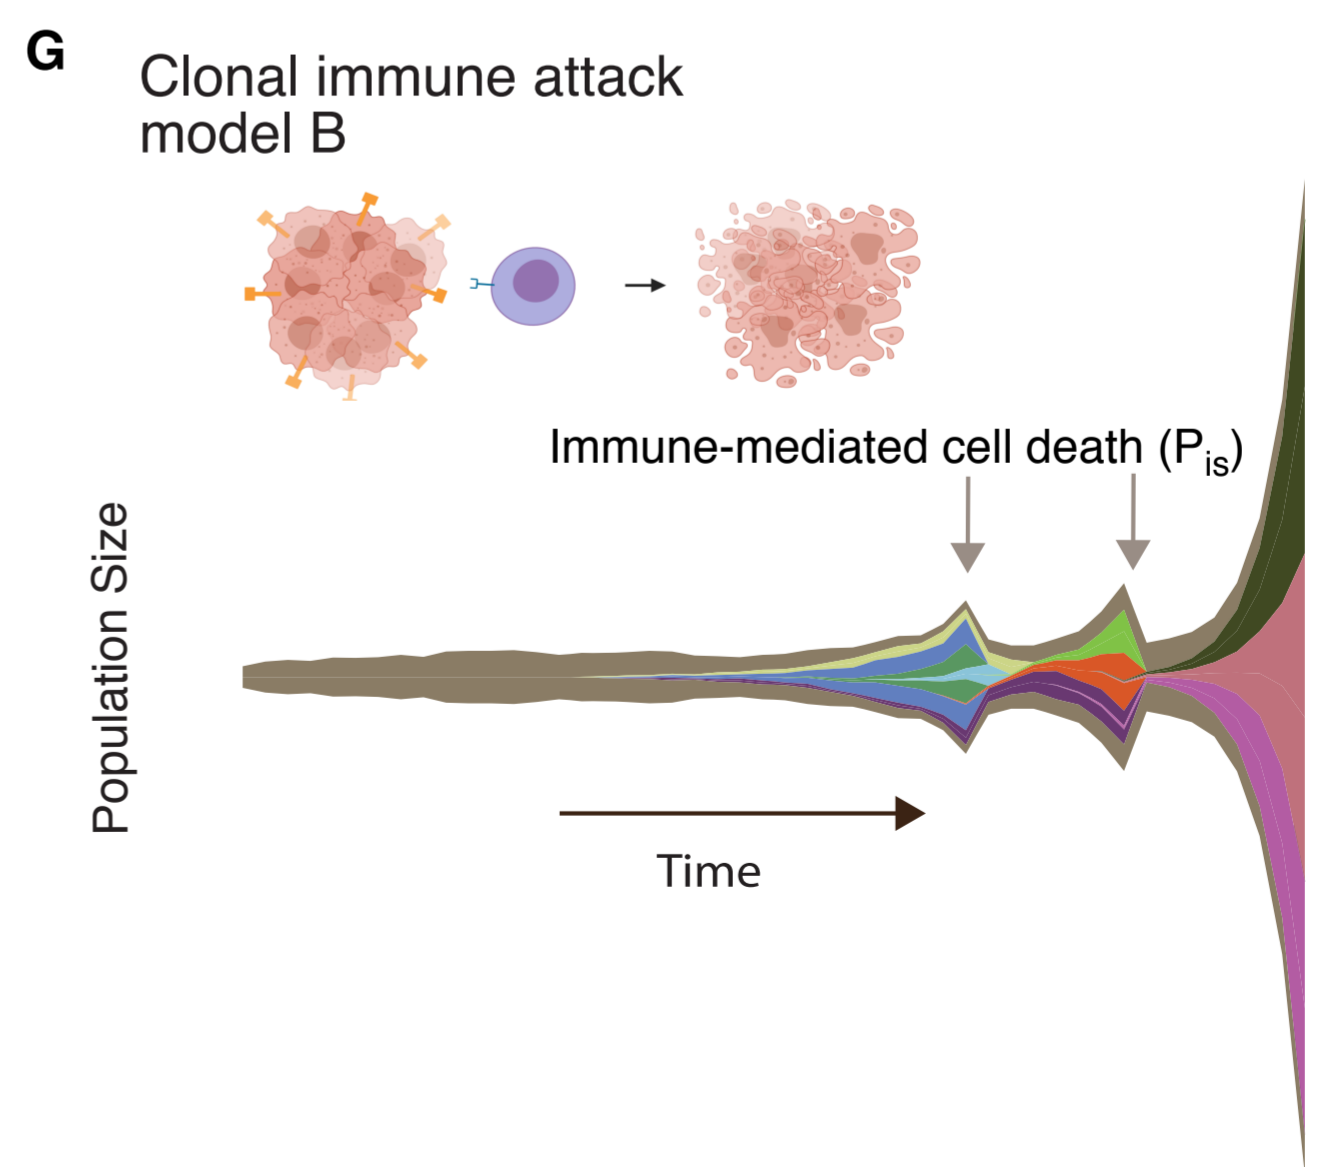

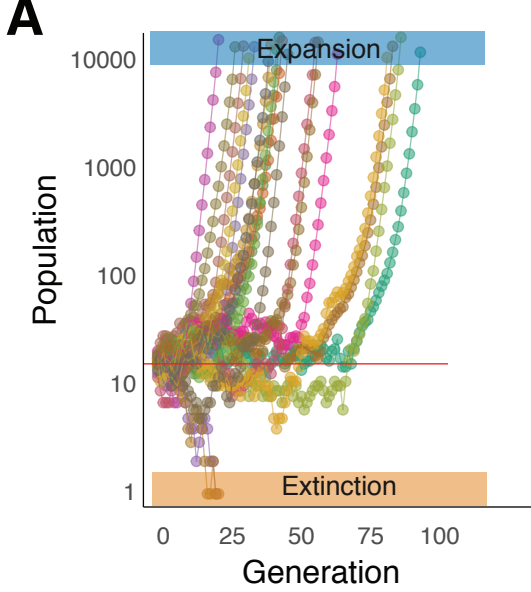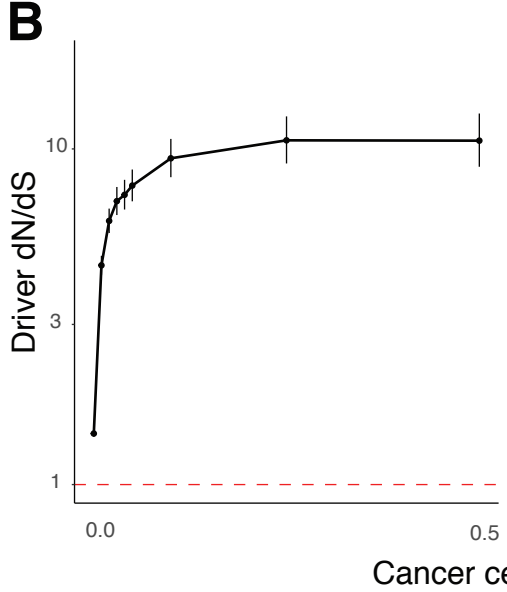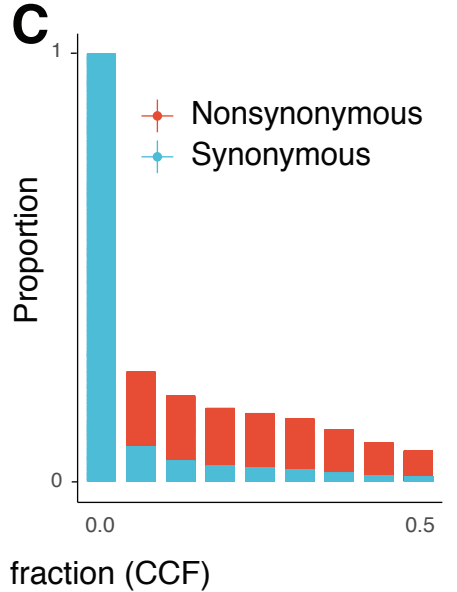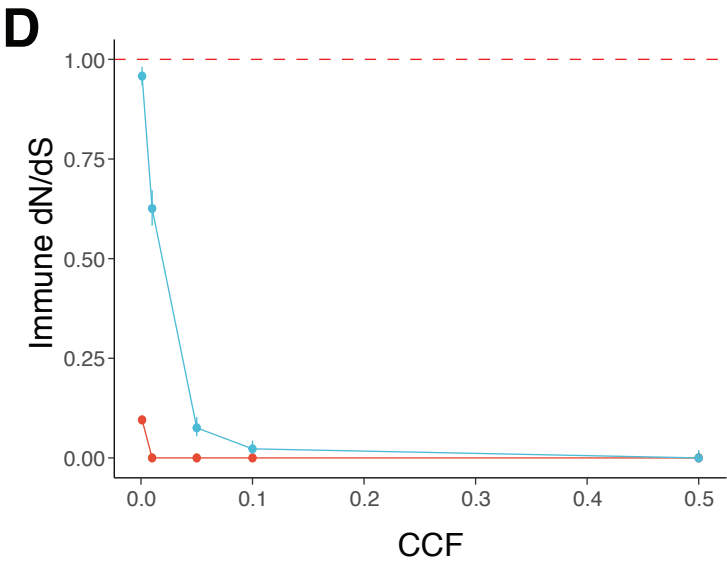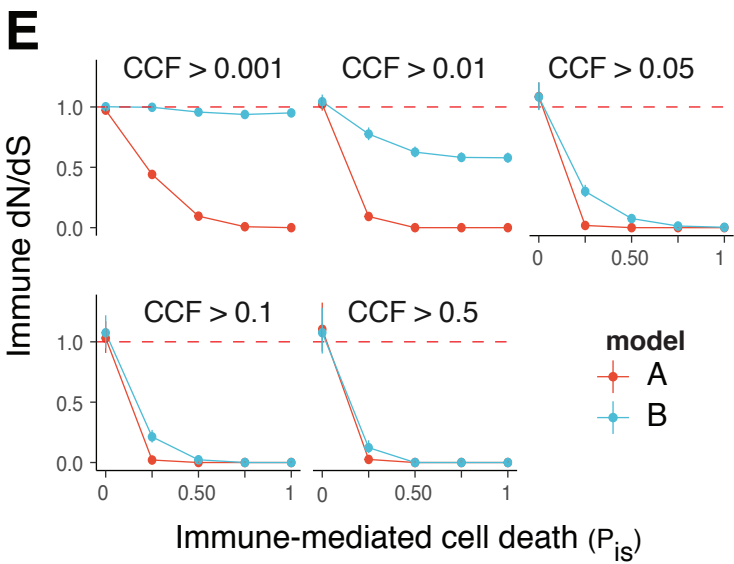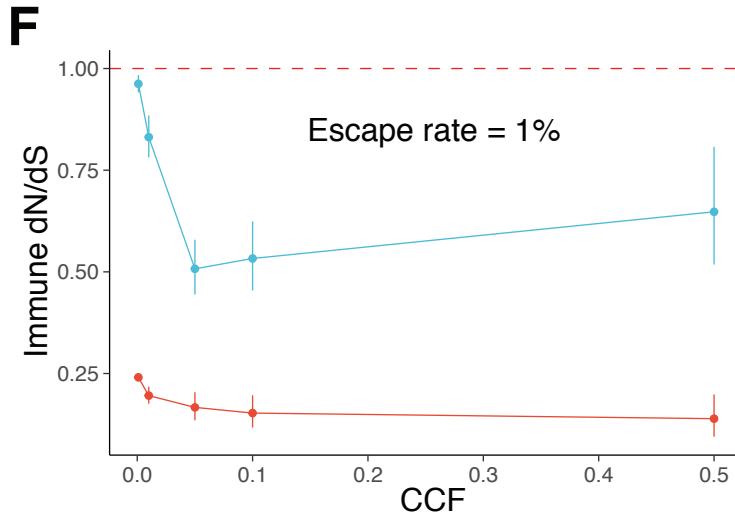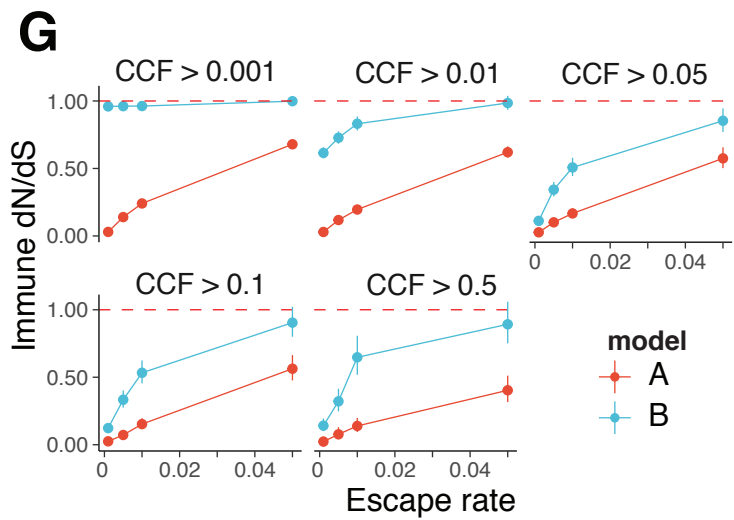

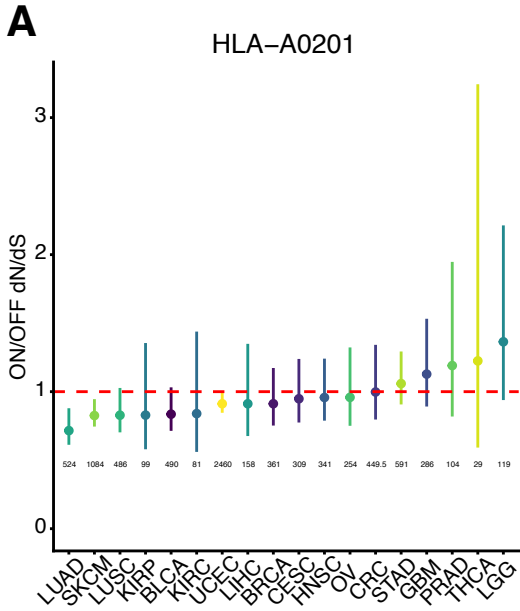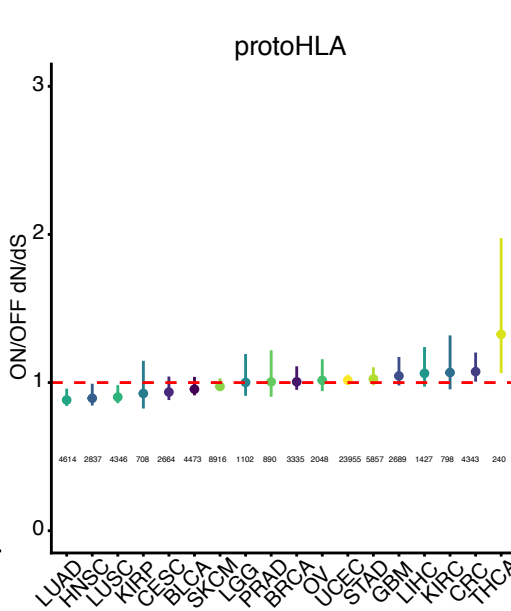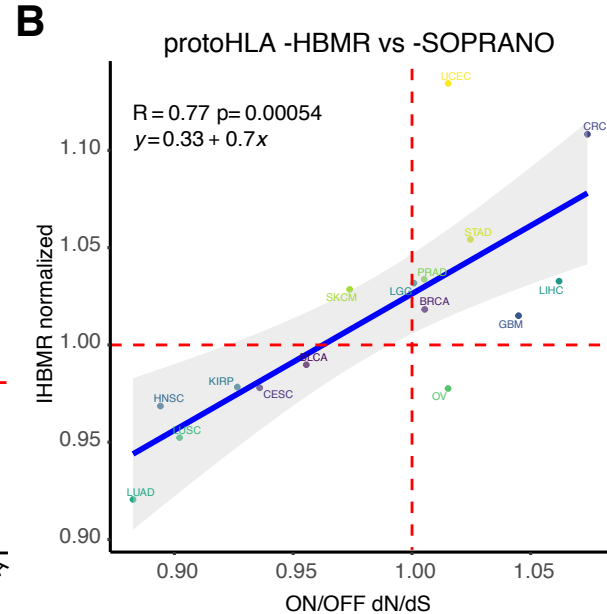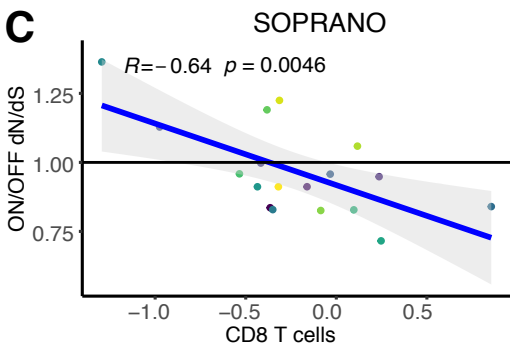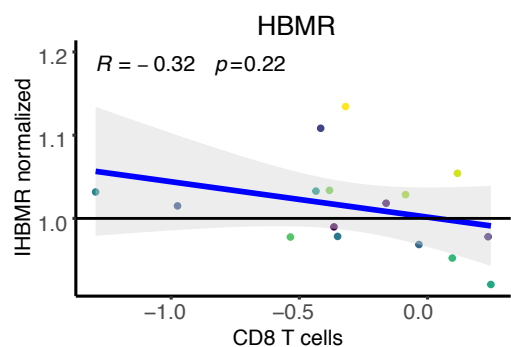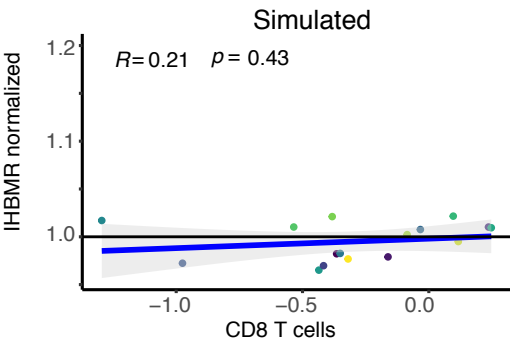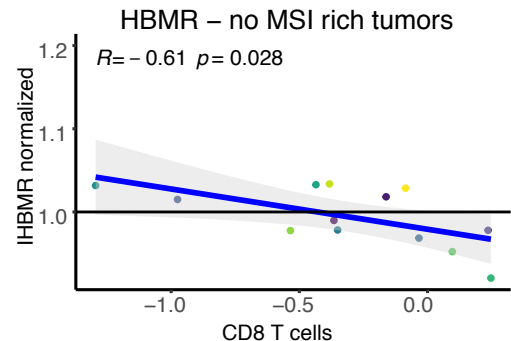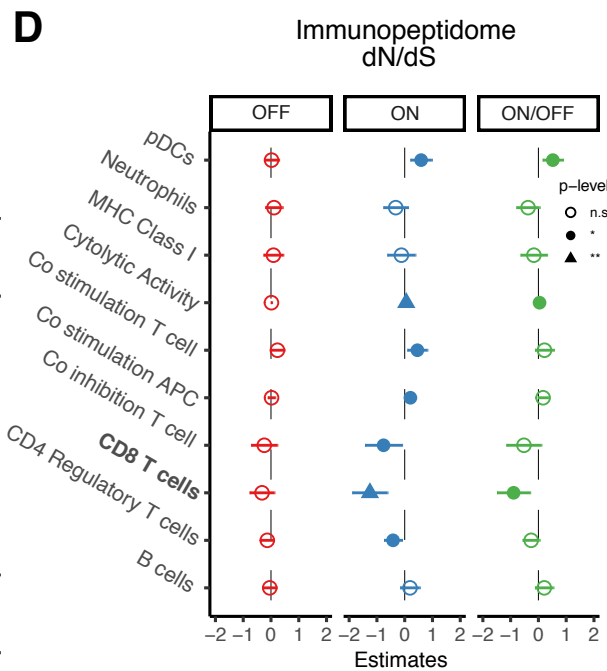

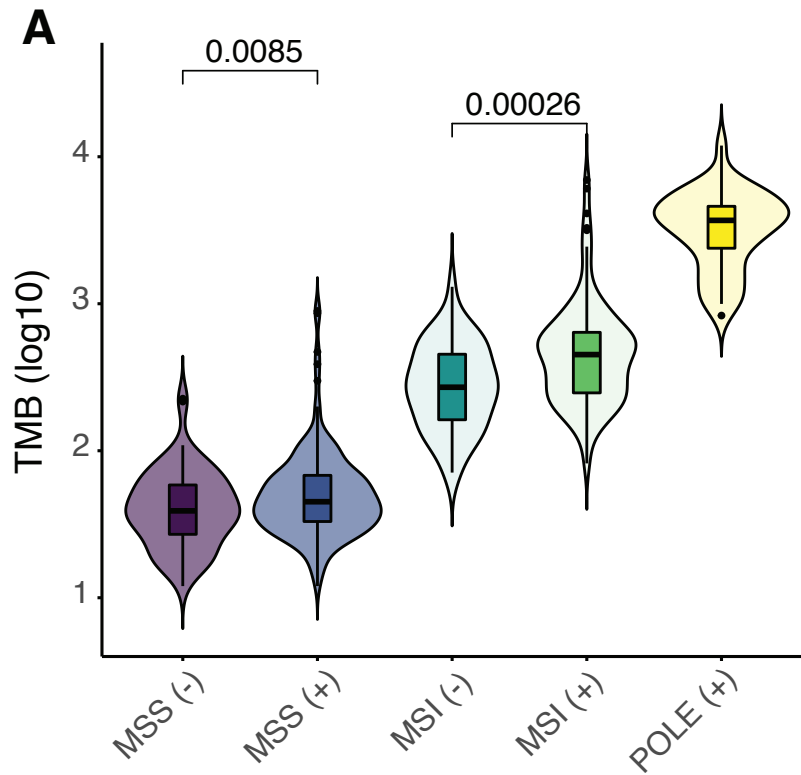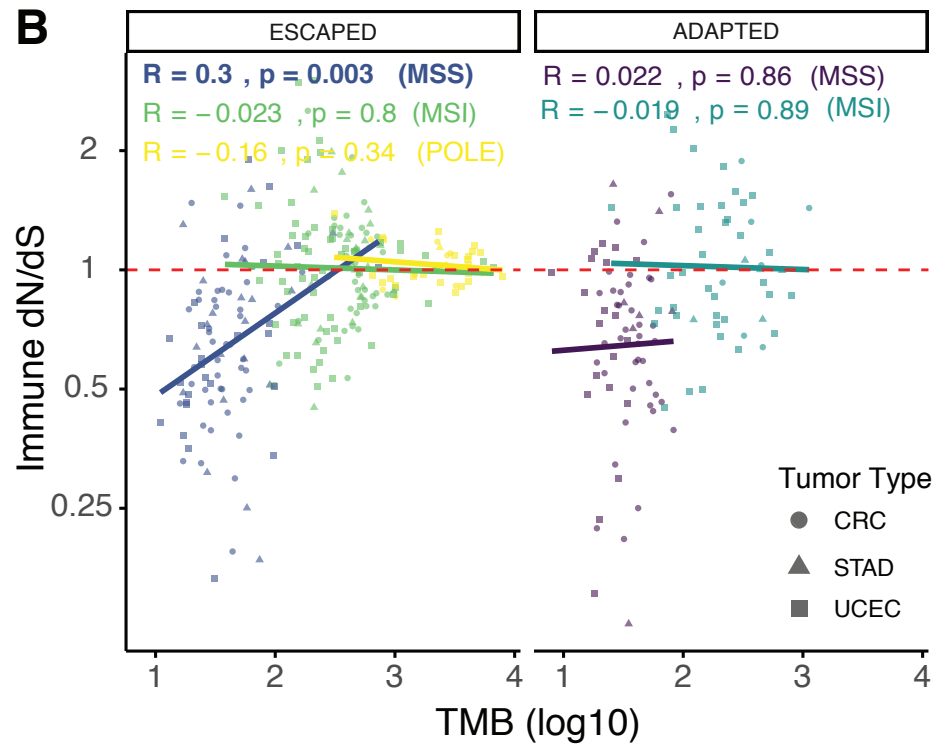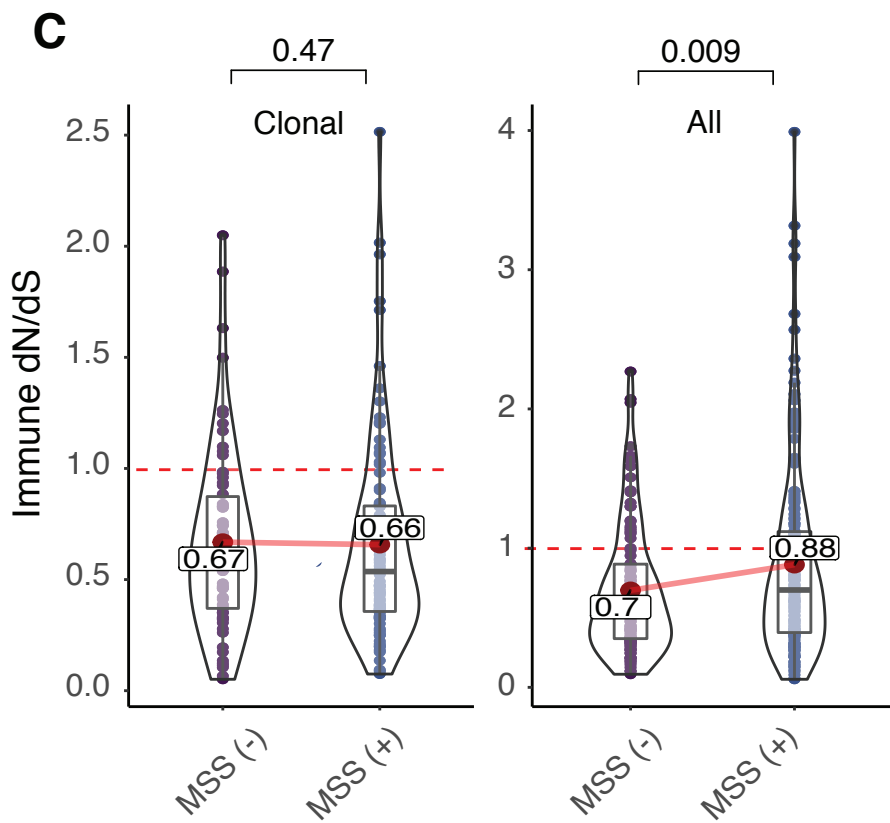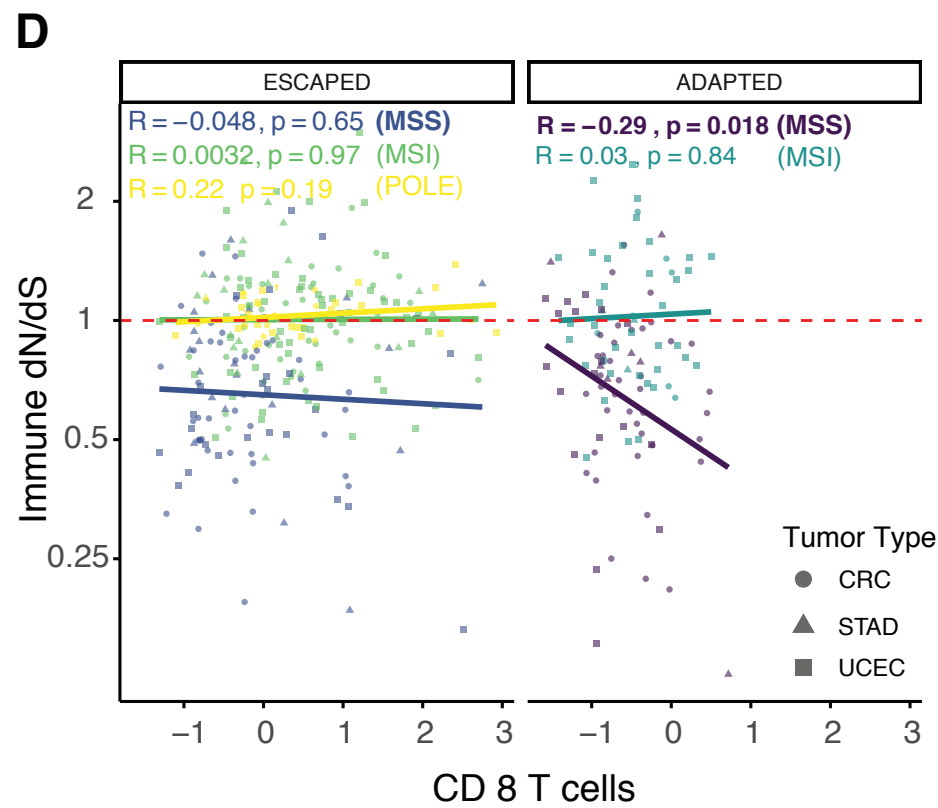



**A**

Hartwig Medical Foundation Cohort (308 patients)

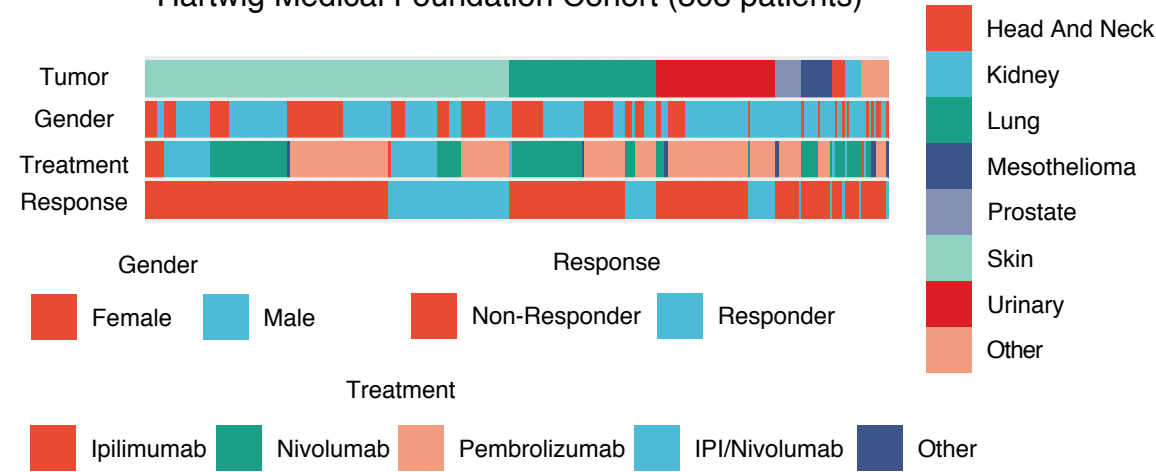

**B**

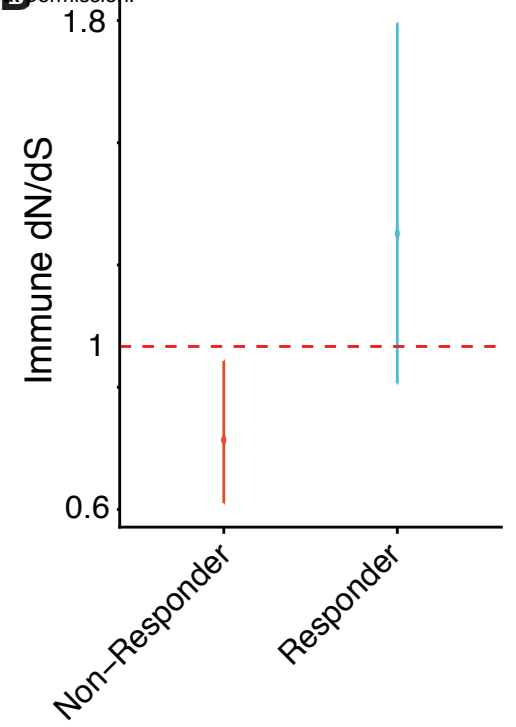

**C**

$\chi^2 p = 0.001$

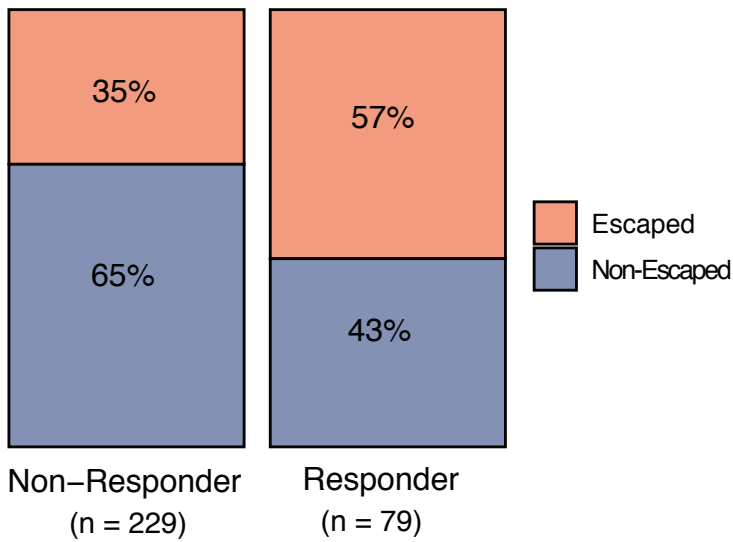

**D**

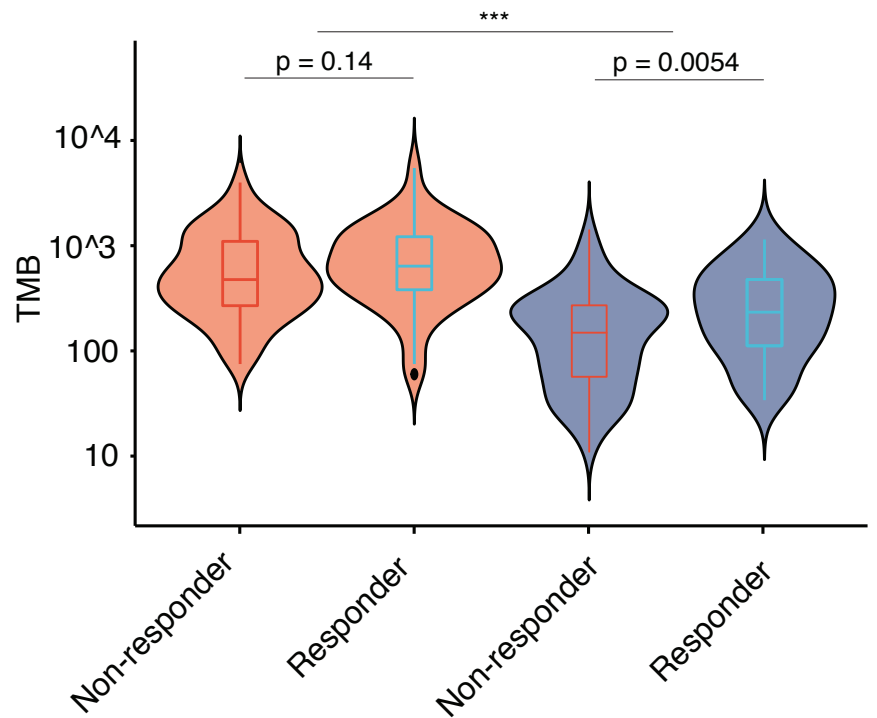

**E**

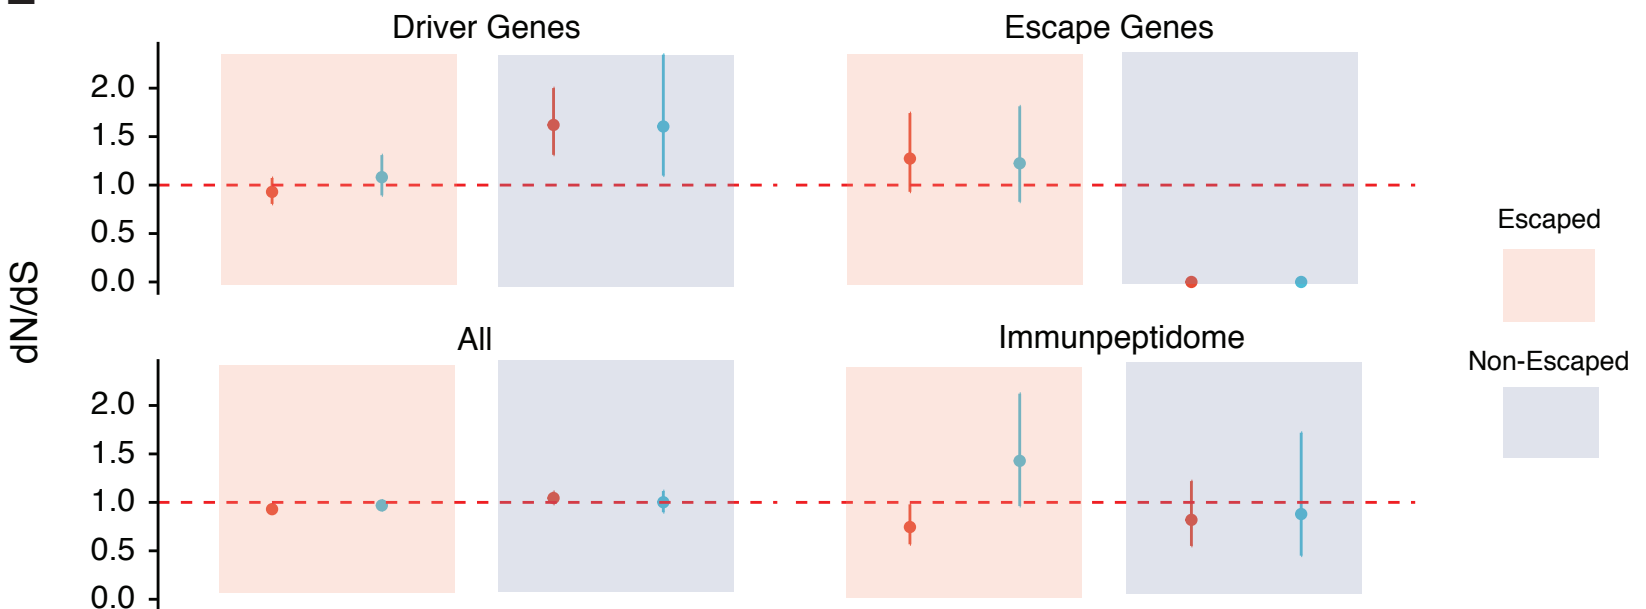

Source: https://www.biorxiv.org/content/10.1101/2020.07.21.215038v1.full.pdf
